# Supplementary material for: Identification of optimal fluorescent probes for G-quadruplex nucleic acids through systematic exploration of mono- and distyryl dye libraries
Source: PubMed Central journal article supplement (PMC6693400; doi:10.3762/bjoc.15.183), 2019-08-06
Supplement: Beilstein_J_Org_Chem-15-1872-s001.pdf [file Beilstein_J_Org_Chem-15-1872-s001.pdf]

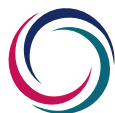

## Supporting Information

for

### **Identification of optimal fluorescent probes for G-quadruplex nucleic acids through systematic exploration of mono- and distyryl dye libraries**

Xiao Xie, Michela Zuffo, Marie-Paule Teulade-Fichou and Anton Granzhan

*Beilstein J. Org. Chem.* **2019**, *15*, 1872–1889. [doi:10.3762/bjoc.15.183](https://doi.org/10.3762/bjoc.15.183)

### **Experimental details and supplementary Tables S1 and S2**

## EXPERIMENTAL SECTION

### Synthesis of dyes

*General remarks.* All commercially available chemicals were reagent grade and used without further purification. NMR spectra were recorded with a Bruker Avance 300 spectrometer ( $^1\text{H}$ : 300 MHz,  $^{13}\text{C}$ : 75 MHz) at 25 °C; chemical shifts are given in ppm ( $\delta$ ) values and calibrated with respect to the signal of the solvent (DMSO:  $\delta_{\text{H}} = 2.50$ ,  $\delta_{\text{C}} = 39.52$  ppm) or MeOH (in  $\text{D}_2\text{O}$ ,  $\delta_{\text{H}} = 3.34$ ,  $\delta_{\text{C}} = 49.50$  ppm). Multiplicities of  $^{13}\text{C}$  NMR signals were determined from DEPT135 or APT experiments. The melting points were determined on a Kofler bench (Wagner & Munz). Elemental microanalysis of all novel compounds was performed by *Service de Microanalyse*, CNRS–ICSN, Gif-sur-Yvette, France. The purity of final compounds was assessed by LC–MS analysis (Waters Alliance 2695 equipped with a Waters XBridge  $\text{C}_{18}$ -3.5  $\mu\text{m}$  column and a photodiode array detector; eluent A: water with 0.05% TFA, eluent B: MeCN with 0.05% TFA, gradient elution with 2 to 100% of eluent B, flow rate: 0.8 mL  $\text{min}^{-1}$ ). Mass spectra (MS, ESI in the positive-ion mode) were recorded with a Waters ZQ instrument. In the assignment of mass spectra of salts, *M* refers to the organic cation or dication.

*Intermediates.* Precursor **I17** was purchased from Sigma-Aldrich. Intermediates **I1** [1], **I2** [2], **I7** [1], **I10** [3] and **I18** [1] were prepared as described in the literature. The synthesis of other precursors is described below.

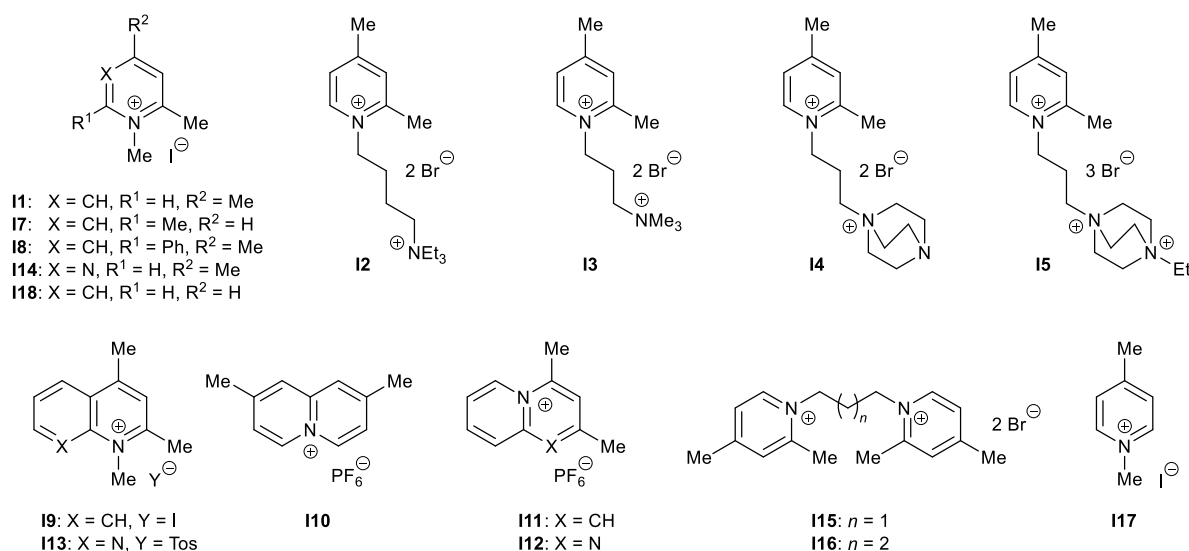

**2,4-Dimethyl-1-(3-trimethylammoniopropyl)pyridinium dibromide (I3):** A solution of (3-bromopropyl)trimethylammonium bromide (2.26 g, 8.65 mmol) in MeCN (25 mL) was brought to reflux, and 2,4-lutidine (1.00 mL, 0.93 g, 8.65 mmol) was added. After heating at reflux for 24 h, the reaction mixture was cooled and the solvent was evaporated to a half of the initial volume under vacuum. The precipitated solid was collected and washed twice with MeCN and

Et<sub>2</sub>O, to yield **I3** (1.50 g, 47%) as a pale-rose solid, m.p. 221–222 °C; <sup>1</sup>H NMR (300 MHz, DMSO): δ 9.04 (d, *J* = 6.5 Hz, 1H), 7.97 (s, 1H), 7.88 (d, *J* = 6.4 Hz, 1H), 4.59 (t, *J* = 7.7 Hz, 2H), 3.52 (dd, *J* = 9.8, 6.6 Hz, 2H), 3.13 (s, 9H), 2.85 (s, 3H), 2.56 (s, 3H), 2.42–2.21 (m, 2H); <sup>13</sup>C NMR (75 MHz, DMSO): δ 158.5 (C<sub>q</sub>), 154.2 (C<sub>q</sub>), 144.6 (CH), 130.1 (CH), 126.2 (CH), 61.7 (CH<sub>2</sub>), 53.1 (CH<sub>2</sub>), 52.5 (CH<sub>3</sub>), 23.3 (CH<sub>2</sub>), 21.2 (CH<sub>3</sub>), 19.7 (CH<sub>3</sub>); MS (ESI<sup>+</sup>): 321.2 [*M* + CF<sub>3</sub>COO<sup>-</sup>]<sup>+</sup>, 207.2 [*M* – H]<sup>+</sup>, 148.2 [*M* – NMe<sub>3</sub> – H]<sup>+</sup>.

**1-(3-Bromopropyl)-2,4-dimethylpyridinium bromide:** A mixture of 2,4-lutidine (5.4 mL, 5.0 g, 47 mmol), 1,3-dibromopropane (9.5 mL, 18.8 g, 93 mmol) and tetra-*n*-butylammonium iodide (0.43 g, 1.17 mmol) in acetone (50 mL) was heated at reflux for 24 h. After cooling, the suspension was filtered and the precipitate was washed with acetone and dried, to give **I15** (2.0 g, 10%) as a white solid (characterization data below). The filtrate was concentrated under vacuum. The resulting oily residue was triturated several times with a large volume of Et<sub>2</sub>O and then dried under vacuum, to give 1-(3-bromopropyl)-2,4-dimethylpyridinium bromide (7.0 g, 49%) as a yellow viscous oil, which was used for the synthesis of **I4** without further purification. <sup>1</sup>H NMR (300 MHz, DMSO): δ 8.85 (d, *J* = 6.5 Hz, 1H), 7.90 (s, 1H), 7.80 (d, *J* = 6.3 Hz, 1H), 4.56 (t, *J* = 7.3 Hz, 2H), 3.46 (t, *J* = 5.8 Hz, 2H), 2.78 (s, 4H), 2.54 (s, 3H), 1.98 (td, *J* = 12.6, 6.1 Hz, 2H); <sup>13</sup>C NMR (75 MHz, DMSO): δ 158.1 (C<sub>q</sub>), 154.0 (C<sub>q</sub>), 144.7 (CH), 130.0 (CH), 126.1 (CH), 57.2 (CH<sub>2</sub>), 54.2 (CH<sub>2</sub>), 32.3 (CH<sub>2</sub>), 21.1 (CH<sub>3</sub>), 19.4 (CH<sub>3</sub>); MS (ESI<sup>+</sup>): *m/z* = 228.1 [*M*]<sup>+</sup>.

**1,1'-(1,3-Propanediyl)-bis(2,4-dimethylpyridinium) dibromide (I15):** White solid, m.p. 225–226 °C; <sup>1</sup>H NMR (300 MHz, DMSO): δ 9.03 (d, *J* = 6.5 Hz, 2H), 7.94 (s, 2H), 7.86 (d, *J* = 6.4 Hz, 2H), 4.69 (t, *J* = 7.8 Hz, 4H), 2.85 (s, 6H), 2.55 (s, 6H), 2.50–2.35 (m, 2H); <sup>13</sup>C NMR (75 MHz, DMSO): δ 158.5 (C<sub>q</sub>), 154.3 (C<sub>q</sub>), 144.5 (CH), 130.1 (CH), 126.1 (CH), 53.1 (CH<sub>2</sub>), 29.6 (CH<sub>2</sub>), 21.2 (CH<sub>3</sub>), 19.7 (CH<sub>3</sub>); MS (ESI<sup>+</sup>): *m/z* = 255.2 [*M* – H]<sup>+</sup>, 128.2 [*M*]<sup>2+</sup>.

**1-(3-(4-aza-1-azoniabicyclo[2.2.2]octyl)propyl)-2,4-dimethylpyridinium dibromide (I4):** A mixture of 1-(3-bromopropyl)-2,4-dimethylpyridinium dibromide (0.535 g, 1.73 mmol) and 1,4-diazabicyclo[2.2.2]octane (0.388 g, 3.46 mmol) in MeCN (20 mL) was stirred at reflux for 16 h, then cooled to room temperature and poured into Et<sub>2</sub>O (200 mL). The precipitate was collected by filtration and washed with Et<sub>2</sub>O, to give **I4** (0.30 g, 41%) as a white, very hygroscopic solid; <sup>1</sup>H NMR (300 MHz, D<sub>2</sub>O): δ 8.57 (d, *J* = 6.5 Hz, 1H), 7.76 (s, 1H), 7.72 (d, *J* = 6.4 Hz, 1H), 4.58 (t, *J* = 7.9 Hz, 2H), 3.55–3.44 (m, 8H), 3.23 (dt, *J* = 11.8, 6.1 Hz, 6H), 2.81 (s, 3H), 2.58 (s, 3H), 2.53–2.38 (m, 2H); <sup>13</sup>C NMR (75 MHz, D<sub>2</sub>O): δ 160.9 (C<sub>q</sub>), 154.8 (C<sub>q</sub>), 144.2 (CH), 131.3 (CH), 127.4 (CH), 61.0 (CH<sub>2</sub>), 53.9 (CH<sub>2</sub>), 53.0 (CH<sub>2</sub>), 44.8 (CH<sub>2</sub>), 23.0 (CH<sub>2</sub>), 21.7 (CH<sub>3</sub>), 20.0 (CH<sub>3</sub>); MS (ESI<sup>+</sup>): *m/z* = 260.3 [*M* – H]<sup>+</sup>, 148.2 [*M* – C<sub>6</sub>H<sub>12</sub>N<sub>2</sub> – H]<sup>+</sup>, 130.7 [*M*]<sup>2+</sup>.

**1-(3-(4-ethyl-1,4-diazoniabicyclo[2.2.2]octyl)propyl)-2,4-dimethylpyridinium tribromide (I5):** A mixture of **I4** (2.00 g, 4.75 mmol) and ethyl bromide (0.35 mL, 0.52 g, 4.75 mmol) in MeCN (50 mL) was heated at 70 °C for 18 h. After cooling, the precipitated solid was collected, washed with MeCN and Et<sub>2</sub>O and dried under vacuum, to give **I5** (0.80 g, 32%) as a white solid, m.p. 216–217 °C; <sup>1</sup>H NMR (300 MHz, D<sub>2</sub>O): δ 8.58 (d, *J* = 6.5 Hz, 1H), 7.77 (s, 1H), 7.72 (d, *J* = 6.4 Hz, 1H), 4.62 (t, *J* = 7.9 Hz, 2H), 4.05 (td, *J* = 13.7, 7.9 Hz, 12H), 3.91 – 3.83 (m, 2H), 3.68 (q, *J* = 7.3 Hz, 2H), 2.81 (s, 3H), 2.58 (s, 3H), 2.57 – 2.47 (m, 2H), 1.43 (t, *J* = 7.3 Hz, 3H); <sup>13</sup>C NMR (75 MHz, D<sub>2</sub>O): δ 161.1 (C<sub>q</sub>), 154.8 (C<sub>q</sub>), 144.3 (CH), 131.4 (CH), 127.4 (CH), 61.8 (CH<sub>2</sub>), 53.4 (CH<sub>2</sub>), 52.2 (CH<sub>2</sub>), 51.2 (CH<sub>2</sub>), 44.8 (CH<sub>2</sub>), 23.3 (CH<sub>2</sub>), 21.7 (CH<sub>3</sub>), 20.0 (CH<sub>3</sub>), 7.7 (CH<sub>3</sub>); MS (ESI<sup>+</sup>): *m/z* = 288.4 [*M* – 2H]<sup>+</sup>, 260.3 [*M* – Et – H]<sup>+</sup>, 148.1 [*M* – (C<sub>6</sub>H<sub>12</sub>N<sub>2</sub>)Et – H]<sup>+</sup>, 130.7 [*M* – Et]<sup>2+</sup>.

**1,2,4-Trimethyl-6-phenylpyridinium iodide (I8):** A solution of 2,4-dimethyl-6-phenylpyridine [4] (0.30 g, 1.64 mmol) and iodomethane (1.02 mL, 2.32 g, 16.4 mmol) in acetone (5 mL) was stirred under reflux for 60 h and cooled to room temperature. The precipitated solid was collected, washed twice with acetone and dried under vacuum, to give **I8** (0.15 g, 28%) as a white solid; <sup>1</sup>H NMR (300 MHz, DMSO): δ 7.95 (s, 1H), 7.78 (s, 1H), 7.70–7.57 (m, 5H), 3.88 (s, 3H), 2.81 (s, 3H), 2.57 (s, 3H); <sup>13</sup>C NMR (75 MHz, DMSO): δ 157.0 (C<sub>q</sub>), 155.4 (C<sub>q</sub>), 154.6 (C<sub>q</sub>), 132.9 (C<sub>q</sub>), 130.8 (CH), 129.1 (CH), 129.0 (CH), 128.5 (CH), 128.0 (CH), 42.1 (CH<sub>3</sub>), 21.2 (CH<sub>3</sub>), 20.9 (CH<sub>3</sub>); MS (ESI<sup>+</sup>): *m/z* = 198.2 [*M*]<sup>+</sup>.

**1,2,4-Trimethylquinolinium iodide (I9):** A solution of 2,4-dimethylquinoline (4.76 mL, 5.00 g, 31.8 mmol) and iodomethane (1.99 mL, 4.51 g, 31.8 mmol) in acetone (50 mL) was stirred at reflux for 18 h and then cooled to room temperature. The precipitated solid was collected, washed twice with acetone and dried under vacuum, to give **I9** (7.30 g, 77%) as a white solid, m.p. 265–266 °C (lit. 254–256 °C [5]); <sup>1</sup>H NMR (300 MHz, DMSO): δ 8.56 (d, *J* = 9.0 Hz, 1H), 8.45 (dd, *J* = 8.4, 1.2 Hz, 1H), 8.20 (ddd, *J* = 8.8, 7.0, 1.4 Hz, 1H), 8.06 (s, 1H), 7.98 (t, *J* = 7.4 Hz, 1H), 4.40 (s, 3H), 3.03 (s, 3H), 2.93 (s, 3H); <sup>13</sup>C NMR (75 MHz, DMSO): δ 159.6 (C<sub>q</sub>), 155.9 (C<sub>q</sub>), 138.7 (C<sub>q</sub>), 134.6 (CH), 128.7 (CH), 127.2 (C<sub>q</sub>), 126.7 (CH), 125.6 (CH), 119.3 (CH), 39.4 (CH<sub>3</sub>), 22.9 (CH<sub>3</sub>), 19.3 (CH<sub>3</sub>); MS (ESI<sup>+</sup>): *m/z* = 172.2 [*M*]<sup>+</sup>.

**2,4-Dimethylquinolizinium hexafluorophosphate (I11):** A solution of 2-picoline (4.28 mL, 4.02 g, 43.2 mmol) in dry Et<sub>2</sub>O (36 mL) was cooled in an ice bath under argon. PhLi (1.9 M solution in Bu<sub>2</sub>O, 23.9 mL, 45.4 mmol) was subsequently added in small portions via a syringe. The dark-yellow solution was stirred in the ice bath for 20 min, then at room temperature for 1 h and finally cooled again in the ice bath. A solution of 1-(2-methyl-1,3-dioxolan-2-yl)propan-2-one [6] (9.34 g, 64.8 mmol) in dry Et<sub>2</sub>O (12 mL) was added. The reaction mixture was stirred in the ice bath for 15 min and then at room temperature for 30 min and finally poured into an

ice-water mixture (100 mL). The organic phase was separated and the aqueous layer was extracted with MTBE (3 × 50 mL). The combined organic phases were washed with water and brine, dried over Na<sub>2</sub>SO<sub>4</sub>. The volatiles were removed in vacuo, yielding a brown residue containing the crude 2-methyl-1-(2-methyl-1,3-dioxolan-2-yl)-3-(pyridin-2-yl)propan-2-ol (4.44 g). The residue was dissolved in Ac<sub>2</sub>O (10 mL) and H<sub>2</sub>SO<sub>4</sub> (96%, 0.50 mL) was carefully added. The mixture was heated at reflux (bath temp. 150 °C) for 3 h, then cooled to room temperature. Ice-water (20 mL) was subsequently added and the resulting mixture was left to stir overnight. Charcoal (1 g) was then added and the mixture was filtered. The filter cake was then rinsed with water. NH<sub>4</sub>PF<sub>6</sub> (6.30 g, 38.6 mmol) dissolved in a small amount of water was added to the filtrate. The precipitated solid was collected by filtration, washed with water (3x), dried under vacuum and recrystallized from EtOH, to give **I11** (1.82 g, 14% yield) as a white crystalline solid. <sup>1</sup>H NMR (300 MHz, DMSO): δ 9.16 (d, *J* = 7.1 Hz, 1H), 8.46 (dd, *J* = 8.3, 1.3 Hz, 1H), 8.38–8.27 (m, 2H), 8.03 (dd, *J* = 7.0 Hz, 1H), 7.99 (s, 1H), 2.97 (s, 3H), 2.64 (s, 3H); <sup>13</sup>C NMR (75 MHz, DMSO): δ 148.7 (C<sub>q</sub>), 144.0 (C<sub>q</sub>), 142.8 (C<sub>q</sub>), 135.7 (CH), 132.6 (CH), 127.0 (CH), 126.8 (CH), 124.5 (CH), 122.7 (CH), 21.0 (CH<sub>3</sub>), 19.8 (CH<sub>3</sub>); MS (ESI<sup>+</sup>): *m/z* = 158.1 [*M*<sup>+</sup>].

**2,4-Dimethyl-1-azaquinolizinium hexafluorophosphate (I12)** [7]: A mixture of 2-aminopyridine (1.00 g, 10.6 mmol) and 2,4-pentanedione (1.31 mL, 12.8 mmol) with polyphosphoric acid (10 mL) was stirred at 90 °C for 3 h and then poured into ice (60 g). A solution of NH<sub>4</sub>PF<sub>6</sub> (6.93 g, 42.5 mmol) in a minimal volume of water was added to the melt. The resulting precipitate was collected by suction filtration, washed with water, and dried to give **I12** (2.90 g, 90%) as a white solid, m.p. 207–208 °C; <sup>1</sup>H NMR (300 MHz, DMSO): δ 9.25 (d, *J* = 6.9 Hz, 1H), 8.61 (ddd, *J* = 8.5, 7.1, 1.2 Hz, 1H), 8.44 (dd, *J* = 8.7, 1.0 Hz, 1H), 8.15–8.07 (m, 2H), 2.99 (s, 3H), 2.83 (s, 3H); <sup>13</sup>C NMR (75 MHz, DMSO): δ 170.3 (C<sub>q</sub>), 152.3 (C<sub>q</sub>), 148.5 (C<sub>q</sub>), 141.4 (CH), 133.0 (CH), 127.3 (CH), 123.0 (CH), 120.6 (CH), 24.9 (CH<sub>3</sub>), 19.4 (CH<sub>3</sub>); MS (ESI<sup>+</sup>): *m/z* = 159.2 [*M*<sup>+</sup>].

**1,2,4-Trimethyl-1,8-naphthyridinium tosylate (I13)**: A mixture of 2,4-dimethyl-1,8-naphthyridine [8,9] (0.791 mg, 5 mmol) and methyl *p*-toluenesulfonate (1.39 g, 7.5 mmol) was put under argon atmosphere, immersed into a preheated (120 °C) oil bath, and heated upon stirring for 45 min. After cooling, acetone (20 mL) was added, and the solid was collected by suction filtration, washed with acetone and dried, to give **I13** (0.305 g, 35%) as a pale-rose solid, m.p. (from 2-PrOH) 210–212 °C; <sup>1</sup>H NMR (300 MHz, DMSO): δ 9.33 (d, *J* = 4.2, 1.6 Hz, 1H), 8.98 (dd, *J* = 8.4, 1.6 Hz, 1H), 8.11 (s, 1H), 8.08 (dd, *J* = 8.4, 4.3 Hz, 1H), 7.45 (d, *J* = 8.0 Hz, 2H), 7.09 (d, *J* = 7.9 Hz, 2H), 4.48 (s, 3H), 3.05 (s, 3H), 2.94 (s, 3H), 2.28 (s, 3H); <sup>13</sup>C NMR (75 MHz, DMSO): δ 162.6 (C<sub>q</sub>), 157.1 (C<sub>q</sub>), 155.5 (CH), 146.5 (C<sub>q</sub>), 145.9 (C<sub>q</sub>), 137.5 (C<sub>q</sub>), 136.9 (CH), 128.0 (CH), 126.0 (CH), 125.4 (CH), 124.7 (CH), 122.4 (C<sub>q</sub>), 36.2 (CH<sub>3</sub>), 22.7

(CH<sub>3</sub>), 20.8 (CH<sub>3</sub>), 18.7 (CH<sub>3</sub>); MS (ESI<sup>+</sup>):  $m/z = 173.2 [M]^+$ . Structure assignment was confirmed by a characteristic NOE signal between the methyl substituents at N(1) ( $\delta_H$  4.48 ppm) and C(2) ( $\delta_H$  3.05 ppm).

**1,4,6-Trimethylpyrimidinium iodide (I14):** A mixture of 4,6-dimethylpyrimidine (2.16 g, 20 mmol) and iodomethane (1.88 mL, 4.26 g, 30 mmol) in acetone (20 mL) was stirred under reflux for 18 h and then cooled to room temperature. The precipitated solid was collected, washed twice with acetone and dried under vacuum, to give **I14** (3.82 g, 76%) as a white solid. <sup>1</sup>H NMR (300 MHz, DMSO):  $\delta$  9.57 (s, 1H), 8.09 (s, 1H), 4.11 (s, 3H), 2.75 (s, 3H), 2.69 (s, 3H); <sup>13</sup>C NMR (75 MHz, DMSO):  $\delta$  174.4 (C<sub>q</sub>), 162.6 (C<sub>q</sub>), 153.7 (CH), 123.4 (CH), 41.3 (CH<sub>3</sub>), 24.3 (CH<sub>3</sub>), 19.6 (CH<sub>3</sub>); MS (ESI<sup>+</sup>):  $m/z = 123.2 [M]^+$ .

**1,1'-(1,4-Butanediyl)-bis(2,4-dimethylpyridinium) dibromide (I16):** A mixture of 2,4-lutidine (5.4 mL, 5.0 g, 47 mmol), 1,4-dibromobutane (2.8 mL, 5.0 g, 23.5 mmol) and tetra-*n*-butylammonium iodide (0.43 g, 1.17 mmol) in acetone (50 mL) was heated under reflux for 24 h. After cooling, the suspension was filtered and the resulting precipitate was washed with acetone and dried, to give **I16** (2.80 g, 28%) as a white solid; <sup>1</sup>H NMR (300 MHz, DMSO):  $\delta$  8.94 (d,  $J = 6.4$  Hz, 2H), 7.93 (s, 2H), 7.82 (dd,  $J = 6.4, 1.4$  Hz, 2H), 4.59 (br s, 4H), 2.82 (s, 6H) 2.54 (s, 6H), 1.95 (br s, 4H); <sup>13</sup>C NMR (75 MHz, DMSO):  $\delta$  158.2 (C<sub>q</sub>), 153.9 (C<sub>q</sub>), 144.4 (CH), 130.1 (CH), 126.1 (CH), 55.7 (CH<sub>2</sub>), 26.0 (CH<sub>2</sub>), 21.1 (CH<sub>3</sub>), 19.5 (CH<sub>3</sub>); MS (ESI<sup>+</sup>):  $m/z = 269.2 [M - H]^+$ , 162.2 [ $M - C_7H_9N - H$ ]<sup>+</sup>, 135.2 [ $M$ ]<sup>2+</sup>.

*Synthesis of dyes.* Dyes **1a**, **7a**, **17a** and **18a** were prepared according to the published procedures and gave satisfactory <sup>1</sup>H and <sup>13</sup>C NMR, MS, and elemental analysis data [1]. The synthesis of the dyes **1y** (**BCVP**) [10] and **2a** [2] was described elsewhere. The purity of all dyes was confirmed by the HPLC analysis.

**General procedure for the synthesis of distyryl dyes by Knoevenagel condensation<sup>1</sup>:** A mixture of the heterocyclic salt **I1–I16** (2.5 mmol), aldehyde (7.5 mmol, 3 molar equiv, unless otherwise stated) and piperidine (0.50 mL, 5 mmol, 2 molar equiv) in EtOH (25 mL) was heated under reflux for 2.5 h. After cooling to room temperature, the precipitated solid was collected by filtration, washed with EtOH (2 × 5 mL) and Et<sub>2</sub>O (2 × 5 mL) and dried. The crude iodide salt was either purified through a recrystallization from a suitable solvent (as indicated below) to give an analytically pure sample, or subjected to anion exchange to bromide or chloride, as described below.

---

<sup>1</sup> Except for the dye **6a** whose preparation is detailed below.

*Procedure for anion exchange:* Ion-exchange resin (Amberlite IRA-402, Cl<sup>-</sup> form, or Amberlite IRA-400, Br<sup>-</sup> form, about 20 mmol equiv) was thoroughly rinsed with a mixture of MeCN and MeOH (1:1, v/v) and charged into a short glass column. The dye (iodide salt) was dissolved in a minimal amount of a mixture of MeCN and MeOH (1:1, v/v) and loaded in the column. The product was then eluted with the same solvent mixture (about 50 mL). The solvents were removed in vacuo and the residue was recrystallized from a suitable solvent (as indicated below), to give an analytically pure dye.

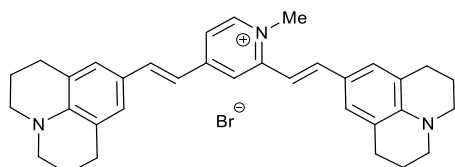

**2,4-Bis((E)-2-(julolidin-9-yl)vinyl)-1-methylpyridinium bromide (1b):** Prepared in 62% yield from **I1** and julolidine-9-carbaldehyde, followed by ion exchange to prepare the bromide salt and recrystallization from MeOH. Black solid, m.p. 247–248 °C; <sup>1</sup>H NMR (300 MHz, DMSO): δ 8.43 (d, *J* = 6.8 Hz, 1H), 8.25 (s, 1H), 7.75 (d, *J* = 15.7 Hz, 2H), 7.62 (d, *J* = 6.1 Hz, 1H), 7.24 (s, 2H), 7.12 (s, 2H), 7.02 (d, *J* = 15.3 Hz, 1H), 6.98 (d, *J* = 15.7 Hz, 1H), 4.10 (s, 3H), 3.29–3.07 (m, 8H), 2.87–2.60 (m, 8H), 2.22–1.68 (m, 8H); <sup>13</sup>C NMR (75 MHz, DMSO): δ 152.1 (C<sub>q</sub>), 151.6 (C<sub>q</sub>), 145.1 (C<sub>q</sub>), 144.8 (C<sub>q</sub>), 144.1 (CH), 143.0 (CH), 140.5 (CH), 128.0 (CH), 127.3 (CH), 121.7 (C<sub>q</sub>), 121.4 (C<sub>q</sub>), 120.7 (C<sub>q</sub>), 120.6 (C<sub>q</sub>), 117.8 (CH), 117.5 (CH), 116.6 (CH), 109.6 (CH), 49.3 (CH<sub>2</sub>), 44.1 (CH<sub>3</sub>), 27.1 (CH<sub>2</sub>), 21.0 (CH<sub>2</sub>); MS (ESI<sup>+</sup>): *m/z* = 488.6 [*M*]<sup>+</sup>; anal. calcd. for C<sub>34</sub>H<sub>38</sub>BrN<sub>3</sub> × 0.5 H<sub>2</sub>O (577.6): C 70.7, H 6.81, N 7.27; found: C 70.79, H 6.42, N 7.01.

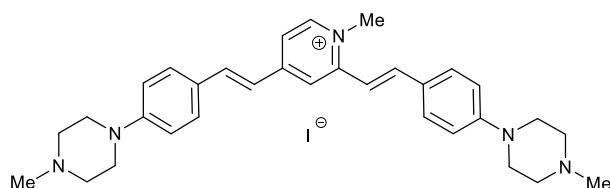

**1-Methyl-2,4-bis((E)-4-(4-methylpiperazin-1-yl)styryl)pyridinium iodide (1c):** Prepared in 47% yield from **I1** and 4-(4-methylpiperazin-1-yl)benzaldehyde, followed by recrystallization from EtOH. Cherry-red solid, m.p. 228–229 °C; <sup>1</sup>H NMR (300 MHz, DMSO): δ 8.59 (d, *J* = 6.7 Hz, 1H), 8.42 (s, 1H), 7.94–7.81 (m, 3H), 7.72 (d, *J* = 8.5 Hz, 2H), 7.59 (d, *J* = 8.4 Hz, 2H), 7.27 (d, *J* = 16.2 Hz, 1H), 7.20 (d, *J* = 16.6 Hz, 1H), 7.03 (d, *J* = 7.2, 4H), 4.19 (s, 3H), 3.38–3.25 (m, 8H), 2.48–2.39 (m, 8H), 2.23 (s, 6H); <sup>13</sup>C NMR (75 MHz, DMSO): δ 152.4 (C<sub>q</sub>), 152.2 (C<sub>q</sub>), 152.1 (C<sub>q</sub>), 151.9 (C<sub>q</sub>), 144.7 (CH), 142.4 (CH), 140.0 (CH), 130.2 (CH), 129.5 (CH), 124.9 (C<sub>q</sub>), 124.6 (C<sub>q</sub>), 119.3 (CH), 119.0 (CH), 114.5 (CH), 114.3 (CH), 112.7 (CH), 54.4 (2 CH<sub>2</sub>), 46.8 (CH<sub>2</sub>), 46.7 (CH<sub>2</sub>), 45.7 (2 CH<sub>3</sub>), 44.5 (CH<sub>3</sub>); MS (ESI<sup>+</sup>): *m/z* = 494.6 [*M*]<sup>+</sup>, 247.9 [*M*

+ H]<sup>+</sup>, 165.7 [M + 2H]<sup>3+</sup>; anal. calcd. for C<sub>32</sub>H<sub>40</sub>N<sub>5</sub> × 0.5 H<sub>2</sub>O (630.6): C 60.95, H 6.55, N 11.11; found: C 60.91, H 6.42, N 11.40.

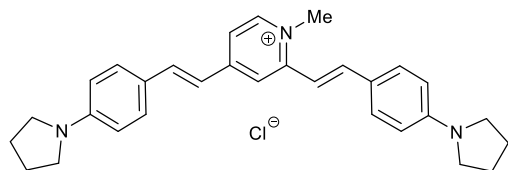

**1-Methyl-2,4-bis((E)-4-(pyrrolidin-1-yl)styryl)pyridinium chloride (1d):** Prepared in 65% yield from **I1** and 4-(pyrrolidin-1-yl)benzaldehyde, followed by ion exchange to prepare the chloride salt. Shiny black crystals, m.p. 248–249 °C; <sup>1</sup>H NMR (300 MHz, DMSO): δ 8.49 (d, *J* = 6.8 Hz, 1H), 8.32 (s, 1H), 7.87 (d, *J* = 16.1 Hz, 1H), 7.86 (d, *J* = 15.7 Hz, 1H), 7.75–7.66 (m, 3H), 7.57 (d, *J* = 8.7 Hz, 2H), 7.14 (d, *J* = 15.7 Hz, 1H), 7.08 (d, *J* = 16.1 Hz, 1H), 6.68–6.61 (m, 4H), 4.14 (s, 3H), 3.49–3.45 (m, 8H), 2.24–1.83 (m, 8H); <sup>13</sup>C NMR (75 MHz, DMSO): δ 152.2 (C<sub>q</sub>), 151.8 (C<sub>q</sub>), 149.3 (C<sub>q</sub>), 149.1 (C<sub>q</sub>), 144.2 (CH), 142.9 (CH), 140.5 (CH), 130.5 (CH), 129.9 (CH), 122.2 (C<sub>q</sub>), 121.9 (C<sub>q</sub>), 118.4 (CH), 117.9 (CH), 116.9 (CH), 112.0 (CH), 111.8 (CH), 110.5 (CH), 47.3 (CH<sub>2</sub>), 44.2 (CH<sub>3</sub>), 24.9 (CH<sub>2</sub>); MS (ESI<sup>+</sup>): *m/z* = 436.3 [M]<sup>+</sup>; anal. calcd. for C<sub>30</sub>H<sub>34</sub>ClN<sub>3</sub> × 1.5 H<sub>2</sub>O (499.1): C 72.20, H 7.47, N 8.42; found: C 72.53, H 7.43, N 8.24.

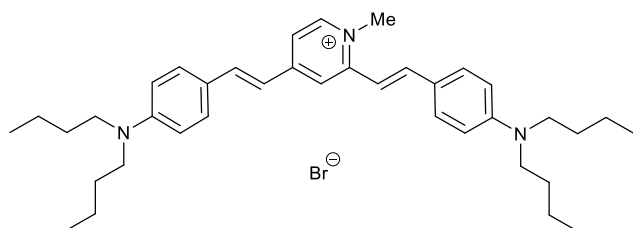

**2,4-Bis((E)-4-(dibutylamino)styryl)-1-methylpyridinium bromide (1db):** Prepared in 13% yield from **I1** and 4-(dibutylamino)benzaldehyde, followed by ion exchange to prepare the bromide salt and recrystallization from MeCN. Brick-red solid, m.p. 246–247 °C; <sup>1</sup>H NMR (300 MHz, DMSO): δ 8.49 (d, *J* = 6.9 Hz, 1H), 8.32 (s, 1H), 7.86 (d, *J* = 15.8 Hz, 2H), 7.74 (d, *J* = 6.0 Hz, 1H), 7.66 (d, *J* = 8.7 Hz, 2H), 7.54 (d, *J* = 8.7 Hz, 2H), 7.11 (d, *J* = 15.4 Hz, 1H), 7.07 (d, *J* = 15.8 Hz, 1H), 6.72 (d, *J* = 8.2 Hz, 4H), 4.13 (s, 3H), 3.44–3.30 (m, 8H), 1.62–1.44 (m, 8H), 1.44–1.23 (m, 8H), 0.93 (t, *J* = 7.2 Hz, 12H); <sup>13</sup>C NMR (75 MHz, DMSO): δ 152.2 (C<sub>q</sub>), 151.8 (C<sub>q</sub>), 149.8 (C<sub>q</sub>), 149.5 (C<sub>q</sub>), 144.2 (CH), 142.7 (CH), 140.4 (CH), 130.7 (CH), 130.0 (CH), 121.9 (C<sub>q</sub>), 121.7 (C<sub>q</sub>), 118.5 (CH), 117.9 (CH), 117.1 (CH), 111.5 (CH), 111.3 (CH), 110.5 (CH), 49.8 (CH<sub>2</sub>), 44.2 (CH<sub>3</sub>), 29.0 (CH<sub>2</sub>), 19.6 (CH<sub>2</sub>), 13.9 (CH<sub>3</sub>); MS (ESI<sup>+</sup>): *m/z* = 552.0 [M]<sup>+</sup>; anal. calcd. for C<sub>38</sub>H<sub>54</sub>BrN<sub>3</sub> × 1.2 H<sub>2</sub>O (654.4): C 69.75, H 8.69, N 6.42; found: C 69.62, H 8.56, N 6.36.



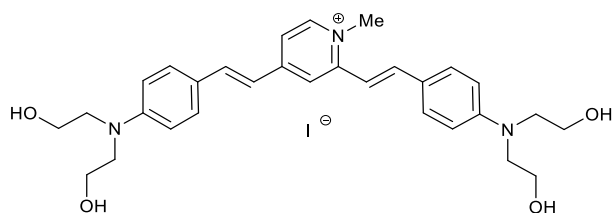

**2,4-Bis((E)-4-(bis(2-hydroxyethyl)amino)styryl)-1-methylpyridinium iodide (1e):**

Prepared in 53% yield from **I1** and 4-[bis(2-hydroxyethyl)amino]benzaldehyde, followed by recrystallization from  $\text{CHCl}_3$ –EtOH. Shiny crimson crystals, m.p. 150–151 °C;  $^1\text{H}$  NMR (300 MHz, DMSO):  $\delta$  8.50 (d,  $J$  = 6.8 Hz, 1H), 8.33 (s, 1H), 7.91–7.82 (m, 2H), 7.74 (d,  $J$  = 6.6 Hz, 1H), 7.66 (d,  $J$  = 8.7 Hz, 2H), 7.54 (d,  $J$  = 8.7 Hz, 2H), 7.14 (d,  $J$  = 15.7 Hz, 1H), 7.09 (d,  $J$  = 16.1 Hz, 1H), 6.80 (dd,  $J$  = 8.8 Hz, 4H), 4.84–4.79 (m, 4H, OH), 4.14 (s, 3H), 3.64–3.47 (m, 16H);  $^{13}\text{C}$  NMR (75 MHz, DMSO):  $\delta$  152.2 ( $\text{C}_q$ ), 151.9 ( $\text{C}_q$ ), 150.3 ( $\text{C}_q$ ), 150.0 ( $\text{C}_q$ ), 144.3 (CH), 142.7 (CH), 130.5 (CH), 129.9 (CH), 122.2 ( $\text{C}_q$ ), 122.1 ( $\text{C}_q$ ), 118.5 (CH), 118.1 (CH), 117.3 (CH), 111.7 (CH), 111.5 (CH), 110.8 (CH), 58.1 ( $\text{CH}_2$ ), 53.1 ( $\text{CH}_2$ ), 44.3 ( $\text{CH}_3$ ); MS (ESI<sup>+</sup>):  $m/z$  = 504.6 [ $M$ ]<sup>+</sup>, 252.8 [ $M + \text{H}$ ]<sup>2+</sup>, 243.9 [ $M - \text{H}_2\text{O} + \text{H}$ ]<sup>2+</sup>; anal. calcd. for  $\text{C}_{30}\text{H}_{38}\text{I}\text{N}_3\text{O}_4 \times \text{H}_2\text{O}$  (649.6): C 55.47, H 6.21, N 6.47; found: C 55.70, H 6.51, N 6.19.

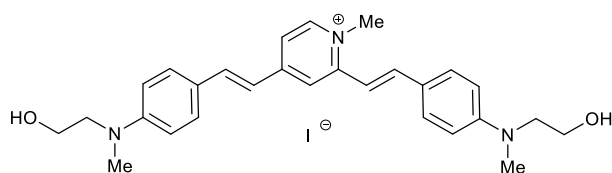

**2,4-Bis((E)-4-((2-hydroxyethyl)(methyl)amino)styryl)-1-methylpyridinium iodide (1f):**

Prepared in 14% yield from **I1** and *N*-methyl-*N*-(2-hydroxyethyl)-4-aminobenzaldehyde, followed by recrystallization from MeCN–MeOH. Shiny black solid, m.p. 239–240 °C;  $^1\text{H}$  NMR (300 MHz, DMSO):  $\delta$  8.50 (d,  $J$  = 6.7 Hz, 1H), 8.35 (s, 1H), 7.88 (d,  $J$  = 15.9 Hz, 2H), 7.74 (d,  $J$  = 6.1 Hz, 1H), 7.68 (d,  $J$  = 8.5 Hz, 2H), 7.56 (d,  $J$  = 8.4 Hz, 2H), 7.14 (d,  $J$  = 15.4 Hz, 1H), 7.10 (d,  $J$  = 15.8 Hz, 1H), 6.79 (d,  $J$  = 7.8 Hz, 4H), 4.83–4.66 (m, 2H, OH), 4.15 (s, 3H), 3.66–3.54 (m, 4H), 3.54–3.44 (m, 4H), 3.04 (s, 3H), 3.03 (s, 3H);  $^{13}\text{C}$  NMR (75 MHz, DMSO):  $\delta$  152.2 ( $\text{C}_q$ ), 151.9 ( $\text{C}_q$ ), 151.1 ( $\text{C}_q$ ), 150.8 ( $\text{C}_q$ ), 144.3 (CH), 142.8 (CH), 140.4 (CH), 130.5 (CH), 129.8 (CH), 122.4 ( $\text{C}_q$ ), 122.2 ( $\text{C}_q$ ), 118.6 (CH), 118.1 (CH), 117.4 (CH), 111.7 (CH), 111.6 (CH), 110.8 (CH), 58.2 ( $\text{CH}_2$ ), 53.9 ( $\text{CH}_2$ ), 44.3 ( $\text{CH}_3$ ), 38.8 (2  $\text{CH}_3$ ); MS (ESI<sup>+</sup>):  $m/z$  = 444.4 [ $M$ ]<sup>+</sup>, 222.8 [ $M + \text{H}$ ]<sup>2+</sup>, 213.8 [ $M - \text{H}_2\text{O} + \text{H}$ ]<sup>2+</sup>; anal. calcd. for  $\text{C}_{28}\text{H}_{34}\text{I}\text{N}_3\text{O}_2$  (571.5): C 58.85, H 6.00, N 7.35; found: C 58.53, H 5.98, N 7.55.

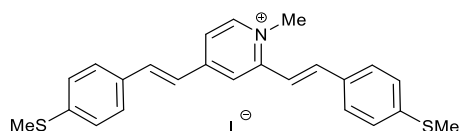

**1-Methyl-2,4-bis((E)-4-(methylthio)styryl)pyridinium iodide (1g):** Prepared in 20% yield from **I1** and 4-(methylthio)benzaldehyde, followed by recrystallization from MeCN– $\text{H}_2\text{O}$ . Dark-

yellow crystals, m.p. 292–293 °C;  $^1\text{H}$  NMR (300 MHz, DMSO):  $\delta$  8.76 (d,  $J$  = 6.7 Hz, 1H), 8.57 (s, 1H), 8.06–7.96 (m, 2H), 7.92 (d,  $J$  = 15.8 Hz, 1H), 7.82 (d,  $J$  = 8.4 Hz, 2H), 7.69 (d,  $J$  = 8.4 Hz, 2H), 7.54 (d,  $J$  = 16.0 Hz, 1H), 7.47–7.34 (m, 5H), 4.27 (s, 3H), 2.55 (s, 3H), 2.54 (s, 3H);  $^{13}\text{C}$  NMR (75 MHz, DMSO):  $\delta$  152.0 (C<sub>q</sub>), 151.9 (C<sub>q</sub>), 145.5 (CH), 142.2 (C<sub>q</sub>), 141.8 (CH), 141.6 (C<sub>q</sub>), 139.5 (CH), 131.6 (C<sub>q</sub>), 131.3 (C<sub>q</sub>), 128.9 (CH), 128.4 (CH), 125.8 (CH), 125.6 (CH), 122.4 (CH), 120.7 (CH), 116.6 (CH), 45.0 (CH<sub>3</sub>), 14.2 (2 CH<sub>3</sub>); MS (ESI<sup>+</sup>):  $m/z$  = 390.3 [ $M$ ]<sup>+</sup>; anal. calcd. for C<sub>24</sub>H<sub>24</sub>IN<sub>2</sub> (517.5): C 55.70, H 4.67, N 2.71; found: C 55.74, H 4.70, N 2.76.

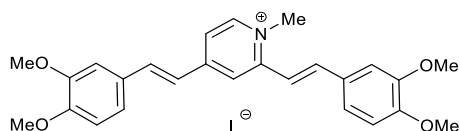

**2,4-Bis((E)-3,4-dimethoxystyryl)-1-methylpyridin-1-ium iodide (1h):** Prepared in 63% yield from **I1** and 3,4-dimethoxybenzaldehyde, followed by recrystallization from MeCN–H<sub>2</sub>O. Yellow solid, m.p. > 280 °C;  $^1\text{H}$  NMR (300 MHz, DMSO):  $\delta$  8.72 (d,  $J$  = 6.7 Hz, 1H), 8.52 (s, 1H), 8.00 (d,  $J$  = 16.3 Hz, 1H), 7.97–7.90 (m, 2H), 7.51–7.35 (m, 5H), 7.30 (dd,  $J$  = 8.3, 1.6 Hz, 1H), 7.10 (d,  $J$  = 8.4 Hz, 1H), 7.08 (d,  $J$  = 8.4 Hz, 1H), 4.26 (s, 3H), 3.88 (s, 3H), 3.86 (s, 3H), 3.84 (s, 3H), 3.83 (s, 3H);  $^{13}\text{C}$  NMR (75 MHz, DMSO):  $\delta$  152.2 (C<sub>q</sub>), 152.0 (C<sub>q</sub>), 151.3 (C<sub>q</sub>), 151.0 (C<sub>q</sub>), 149.1 (C<sub>q</sub>), 149.1 (C<sub>q</sub>), 145.3 (CH), 142.5 (CH), 140.1 (CH), 128.2 (C<sub>q</sub>), 127.9 (C<sub>q</sub>), 123.4 (CH), 122.8 (CH), 121.1 (CH), 120.2 (CH), 120.1 (CH), 115.2 (CH), 111.8 (CH), 111.7 (CH), 110.6 (CH), 109.7 (CH), 55.9 (CH<sub>3</sub>), 55.7 (CH<sub>3</sub>), 55.65 (CH<sub>3</sub>), 55.6 (CH<sub>3</sub>), 44.9 (CH<sub>3</sub>); MS (ESI<sup>+</sup>):  $m/z$  = 418.4 [ $M$ ]<sup>+</sup>; anal. calcd. for C<sub>26</sub>H<sub>28</sub>NIO<sub>4</sub> × 0.5 H<sub>2</sub>O (554.4): C 56.33, H 5.27, N 2.53; found: C 56.45, H 5.21, N 2.43.

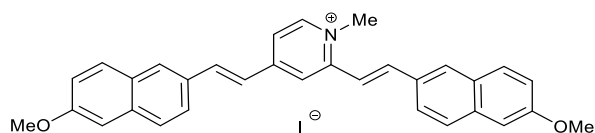

**2,4-Bis((E)-2-(6-methoxynaphthalen-2-yl)vinyl)-1-methylpyridinium iodide (1i):** Prepared in 39% yield from **I1** and 6-methoxy-2-naphthaldehyde, followed by recrystallization from MeOH–MeNO<sub>2</sub>. Yellow microcrystalline solid, m.p. > 280 °C;  $^1\text{H}$  NMR (300 MHz, DMSO):  $\delta$  8.78 (d,  $J$  = 6.8 Hz, 1H), 8.65 (s, 1H), 8.28–8.04 (m, 5H), 8.01 (d,  $J$  = 5.5 Hz, 1H), 7.98–7.85 (m, 5H), 7.63 (d,  $J$  = 15.9 Hz, 1H), 7.55 (d,  $J$  = 16.3 Hz, 1H), 7.40 (dd,  $J$  = 8.0, 2.2 Hz, 2H), 7.29–7.18 (m, 2H), 4.31 (s, 3H), 3.92 (s, 3H), 3.91 (s, 3H);  $^{13}\text{C}$  NMR (75 MHz, DMSO):  $\delta$  158.7 (C<sub>q</sub>), 158.6 (C<sub>q</sub>), 152.0 (C<sub>q</sub>), 151.9 (C<sub>q</sub>), 145.5 (CH), 142.5 (CH), 140.2 (CH), 135.6 (C<sub>q</sub>), 135.3 (C<sub>q</sub>), 130.7 (C<sub>q</sub>), 130.5 (C<sub>q</sub>), 130.3 (CH), 130.2 (CH), 130.1 (CH), 129.5 (CH), 128.3 (C<sub>q</sub>), 128.2 (C<sub>q</sub>), 127.7 (CH), 127.6 (CH), 124.7 (CH), 124.1 (CH), 122.7 (CH), 120.8 (CH), 120.6 (CH), 119.5 (CH), 119.4 (CH), 116.8 (CH), 106.4 (CH), 55.4 (2 CH<sub>3</sub>), 45.1 (CH<sub>3</sub>); MS (ESI<sup>+</sup>):  $m/z$  = 458.3 [ $M$ ]<sup>+</sup>; anal. calcd. for C<sub>32</sub>H<sub>28</sub>INO<sub>2</sub> (585.5): C 65.65, H 4.82, N 2.39; found: C 65.37, H 4.98, N 2.38.

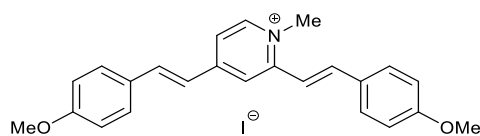

**2,4-Bis((E)-4-methoxystyryl)-1-methylpyridinium iodide (1j):** Prepared in 77% yield from **I1** and 4-methoxybenzaldehyde, followed by recrystallization from MeCN–H<sub>2</sub>O. Lemon-yellow needles, m.p. 278–279 °C; <sup>1</sup>H NMR (300 MHz, DMSO): δ 8.72 (d, *J* = 6.7 Hz, 1H), 8.52 (s, 1H), 8.09–7.88 (m, 3H), 7.84 (d, *J* = 8.8 Hz, 2H), 7.71 (d, *J* = 8.7 Hz, 2H), 7.42 (d, *J* = 15.9 Hz, 1H), 7.33 (d, *J* = 16.3 Hz, 1H), 7.17–6.98 (m, 4H), 4.25 (s, 3H), 3.85 (s, 3H), 3.83 (s, 3H); <sup>13</sup>C NMR (75 MHz, DMSO): δ 161.4 (C<sub>q</sub>), 161.1 (C<sub>q</sub>), 152.2 (C<sub>q</sub>), 152.1 (C<sub>q</sub>), 145.3 (CH), 142.1 (CH), 139.8 (CH), 130.4 (CH), 129.7 (CH), 127.9 (C<sub>q</sub>), 127.7 (C<sub>q</sub>), 121.0 (CH), 120.2 (CH), 115.2 (CH), 114.7 (CH), 114.6 (CH), 55.5 (CH<sub>3</sub>), 55.4 (CH<sub>3</sub>), 44.9 (CH<sub>3</sub>); MS (ESI<sup>+</sup>): *m/z* = 358.3 [*M*]<sup>+</sup>; anal. calcd. for C<sub>24</sub>H<sub>24</sub>INO<sub>2</sub> (485.4): C 59.39, H 4.98, N 2.89; found: C 59.41, H 4.97, N 2.93.

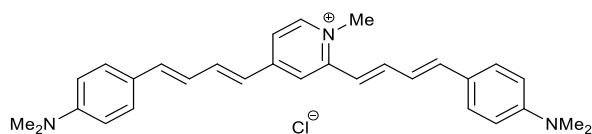

**2,4-Bis((1E,3E)-4-(4-(dimethylamino)phenyl)buta-1,3-dien-1-yl)-1-methylpyridinium chloride (1k):** Prepared in 42% yield through the reaction of **I1** with 4-(dimethylamino) cinnamaldehyde in a mixture EtOH (30 mL) and CHCl<sub>3</sub> (5 mL) as described above, followed by ion exchange to prepare the chloride salt and recrystallization from MeCN–EtOH. Black metal-shiny solid, m.p. 233–234 °C; <sup>1</sup>H NMR (300 MHz, DMSO): δ 8.56 (d, *J* = 6.8 Hz, 1H), 8.31 (s, 1H), 7.90–7.76 (m, 2H), 7.73 (d, *J* = 6.8 Hz, 1H), 7.47 (d, *J* = 8.8 Hz, 4H), 7.18–6.96 (m, 4H), 6.88 (d, *J* = 15.0 Hz, 1H), 6.75 (d, *J* = 8.8 Hz, 2H), 6.73 (d, *J* = 8.8 Hz, 2H), 6.67 (d, *J* = 15.4 Hz, 1H), 4.09 (s, 3H), 2.99 (s, 6H), 2.98 (s, 6H); <sup>13</sup>C NMR (75 MHz, DMSO): δ 151.6 (C<sub>q</sub>), 151.4 (C<sub>q</sub>), 151.1 (C<sub>q</sub>), 151.0 (C<sub>q</sub>), 144.6 (CH), 144.1 (CH), 142.2 (CH), 142.0 (CH), 141.2 (CH), 129.0 (CH), 129.0 (CH), 123.7 (C<sub>q</sub>), 123.7 (CH), 123.5 (C<sub>q</sub>), 123.3 (CH), 123.2 (CH), 119.0 (CH), 118.8 (CH), 117.2 (CH), 112.1 (CH), 112.0 (CH), 44.2 (CH<sub>3</sub>), 39.8 (CH<sub>3</sub>); MS (ESI<sup>+</sup>): *m/z* = 436.5 [*M*]<sup>+</sup>; anal. calcd. for C<sub>30</sub>H<sub>34</sub>ClN<sub>3</sub> × 0.5 H<sub>2</sub>O (481.1): C 74.90, H 7.33, N 8.73; found: C 75.20, H 7.31, N 8.65.

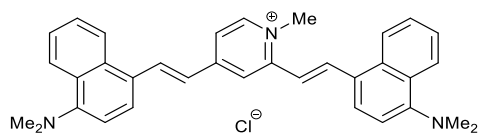

**2,4-Bis((E)-2-(4-(dimethylamino)naphthalen-1-yl)vinyl)-1-methylpyridinium chloride (1l):** Prepared in 50% yield from **I1** and 4-dimethylamino-1-naphthaldehyde, followed by ion exchange to prepare the chloride salt and recrystallization from EtOAc–MeOH. Black microcrystalline solid, m.p. 224–225 °C; <sup>1</sup>H NMR (300 MHz, DMSO): δ 8.88 (s, 1H), 8.85–8.70 (m, 3H), 8.61 (t, *J* = 8.3 Hz, 2H), 8.30 (dd, *J* = 6.7, 1.3 Hz, 1H), 8.25–8.14 (m, 3H), 8.05 (d, *J*

= 8.1 Hz, 1H), 7.71–7.59 (m, 4H), 7.54 (d,  $J = 15.6$  Hz, 1H), 7.52 (d,  $J = 16.0$  Hz, 1H), 7.21 (d,  $J = 8.1$  Hz, 1H), 7.20 (d,  $J = 8.1$  Hz, 1H), 4.32 (s, 3H), 2.94 (s, 6H), 2.92 (s, 6H);  $^{13}\text{C}$  NMR (75 MHz, DMSO):  $\delta$  153.2 (C<sub>q</sub>), 152.8 (C<sub>q</sub>), 151.9 (C<sub>q</sub>), 151.8 (C<sub>q</sub>), 145.0 (CH), 138.7 (CH), 136.3 (CH), 132.5 (C<sub>q</sub>), 127.5 (C<sub>q</sub>), 127.4 (C<sub>q</sub>), 126.9 (CH), 126.7 (CH), 126.4 (CH), 126.1 (C<sub>q</sub>), 125.7 (C<sub>q</sub>), 125.4 (2 CH), 124.9 (CH), 124.8 (CH), 124.3 (CH), 124.2 (CH), 123.7 (CH), 121.8 (CH), 120.2 (CH), 117.6 (CH), 113.7 (CH), 113.5 (CH), 44.8 (CH<sub>3</sub>), 44.5 (2 CH<sub>3</sub>); MS (ESI<sup>+</sup>):  $m/z = 484.6 [M]^+$ ,  $242.8 [M + H]^{2+}$ ; anal. calcd. for C<sub>34</sub>H<sub>34</sub>ClN<sub>3</sub> × 2 H<sub>2</sub>O (556.1): C 73.43, H 6.89, N 7.56; found: C 73.30, H 6.49, N 7.29.

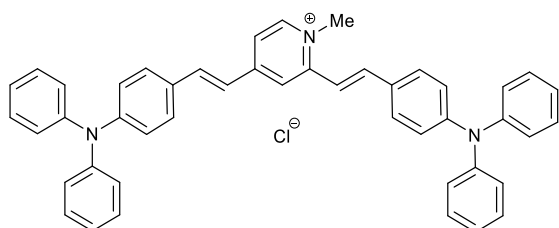

**2,4-Bis((E)-4-(diphenylamino)styryl)-1-methylpyridinium chloride (1m):** Prepared in 10% yield through the reaction of **I1** and 4-(*N,N*-diphenylamino)benzaldehyde in a mixture EtOH (25 mL) and CHCl<sub>3</sub> (10 mL) as described above, followed by ion exchange to prepare the chloride salt and recrystallization from MeCN–EtOH. Orange-red solid, m.p. 293–294 °C;  $^1\text{H}$  NMR (300 MHz, DMSO):  $\delta$  8.67 (d,  $J = 6.4$  Hz, 1H), 8.48 (s, 1H), 8.07–7.82 (m, 3H), 7.73 (d,  $J = 8.2$  Hz, 2H), 7.61 (d,  $J = 8.6$  Hz, 2H), 7.45–7.28 (m, 10H), 7.27–7.04 (m, 12H), 7.02–6.92 (m, 4H), 4.21 (s, 3H). A  $^{13}\text{C}$  NMR spectrum could not be obtained due to insufficient solubility; MS (ESI<sup>+</sup>):  $m/z = 632.4 [M]^+$ ; anal. calcd. for C<sub>46</sub>H<sub>38</sub>ClN<sub>3</sub> × 0.2 H<sub>2</sub>O (671.9): C 82.23, H 5.76, N 6.25; found: C 82.22, H 5.73, N 6.26.

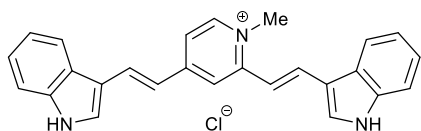

**2,4-Bis((E)-2-(1H-indol-3-yl)vinyl)-1-methylpyridinium chloride (1o):** Prepared in 11% yield from **I1** and indole-3-carbaldehyde, followed by ion exchange to prepare the chloride salt and recrystallization from MeCN–EtOH. Brick-red solid, m.p. 310–311 °C;  $^1\text{H}$  NMR (300 MHz, DMSO):  $\delta$  12.17 (br s, 1H), 12.03 (br s, 1H), 8.56 (d,  $J = 6.9$  Hz, 1H), 8.51 (s, 1H), 8.29–8.08 (m, 5H), 7.93 (s, 1H), 7.84 (dd,  $J = 6.8, 1.3$  Hz, 1H), 7.58–7.48 (m, 2H), 7.36–7.19 (m, 6H), 4.21 (s, 3H);  $^{13}\text{C}$  NMR (75 MHz, DMSO):  $\delta$  152.7 (C<sub>q</sub>), 152.6 (C<sub>q</sub>), 144.1 (CH), 137.6 (C<sub>q</sub>), 137.4 (C<sub>q</sub>), 136.6 (CH), 134.9 (CH), 131.8 (CH), 131.7 (CH), 125.0 (C<sub>q</sub>), 124.9 (C<sub>q</sub>), 122.9 (CH), 122.8 (CH), 121.1 (CH), 120.9 (CH), 120.5 (CH), 120.2 (CH), 118.1 (CH), 117.5 (CH), 117.3 (CH), 113.5 (C<sub>q</sub>), 113.4 (C<sub>q</sub>), 112.6 (2 CH), 110.8 (CH), 44.1 (CH<sub>3</sub>); MS (ESI<sup>+</sup>):  $m/z = 376.4 [M]^+$ ; anal. calcd. for C<sub>26</sub>H<sub>22</sub>ClN<sub>3</sub> × 1.2 H<sub>2</sub>O (433.6): C 72.03, H 5.67, N 9.69; found: C 71.99, H 5.70, N 9.60.

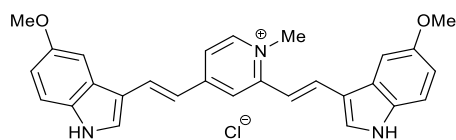

**2,4-Bis((E)-2-(5-methoxy-1H-indol-3-yl)vinyl)-1-methylpyridinium chloride (1p):**

Prepared in 28% yield from **I1** and 5-methoxyindole-3-carbaldehyde, followed by ion exchange to prepare the chloride salt and recrystallization from MeCN–MeOH. Bright-orange solid, m.p. 230–231 °C; <sup>1</sup>H NMR (300 MHz, DMSO): δ 11.95 (br s, 1H), 11.83 (br s, 1H), 8.54 (d, *J* = 6.9 Hz, 1H), 8.48 (d, *J* = 1.4 Hz, 1H), 8.25 (d, *J* = 15.8 Hz, 1H), 8.23 (d, *J* = 16.3 Hz, 1H), 8.11 (s, 1H), 7.90 (s, 1H), 7.84 (dd, *J* = 8.4, 1.5 Hz, 1H), 7.63 (d, *J* = 2.2 Hz, 1H), 7.58 (d, *J* = 2.3 Hz, 1H), 7.43 (d, *J* = 8.8 Hz, 1H), 7.42 (d, *J* = 8.8 Hz, 1H), 7.21 (d, *J* = 16.3 Hz, 1H), 7.18 (d, *J* = 15.8 Hz, 1H), 6.96–6.85 (m, 2H), 4.21 (s, 3H), 3.89 (s, 3H), 3.88 (s, 3H); <sup>13</sup>C NMR (75 MHz, DMSO): δ 153.8 (C<sub>q</sub>), 153.7 (C<sub>q</sub>), 151.5 (C<sub>q</sub>), 151.4 (C<sub>q</sub>), 142.8 (CH), 135.3 (CH), 133.6 (CH), 131.2 (C<sub>q</sub>), 131.0 (C<sub>q</sub>), 130.3 (2 CH), 124.8 (C<sub>q</sub>), 124.6 (C<sub>q</sub>), 116.7 (CH), 116.0 (CH), 115.7 (CH), 112.2 (C<sub>q</sub>), 112.1 (CH), 112.0 (CH), 111.1 (CH), 110.9 (CH), 109.1 (CH), 101.9 (CH), 101.3 (CH), 54.6 (CH<sub>3</sub>), 54.4 (CH<sub>3</sub>), 42.8 (CH<sub>3</sub>); MS (ESI<sup>+</sup>): *m/z* = 436.0 [*M*]<sup>+</sup>; anal. calcd. for C<sub>28</sub>H<sub>26</sub>ClN<sub>3</sub>O<sub>2</sub> × H<sub>2</sub>O (490.0): C 68.63, H 5.76, N 8.58; found: C 68.89, H 6.02, N 8.76.

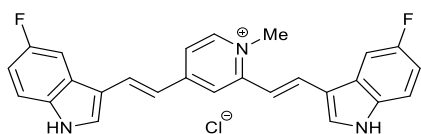

**2,4-Bis((E)-2-(5-fluoro-1H-indol-3-yl)vinyl)-1-methylpyridinium chloride (1q):**

Prepared in 42% yield from **I1** and 5-fluoroindole-3-carbaldehyde, followed by ion exchange to prepare the chloride salt and recrystallization from MeCN–MeOH. Tangerine solid, m.p. > 310 °C; <sup>1</sup>H NMR (300 MHz, DMSO): δ 12.30 (br s, 1H), 12.17 (br s, 1H), 8.58 (d, *J* = 6.9 Hz, 1H), 8.51 (d, *J* = 1.2 Hz, 1H), 8.27–8.15 (m, 3H), 8.05–7.91 (m, 3H), 7.86 (dd, *J* = 6.8, 1.4 Hz, 1H), 7.54 (dt, *J* = 8.8, 4.4 Hz, 2H), 7.26 (d, *J* = 16.7 Hz, 1H), 7.20 (d, *J* = 16.1 Hz, 1H), 7.16–7.06 (m, 2 H), 4.22 (s, 3H); <sup>13</sup>C NMR (75 MHz, DMSO): δ 158.2 (d, *J*<sub>CF</sub> = 234 Hz, C<sub>q</sub>), 158.1 (d, *J*<sub>CF</sub> = 233 Hz, C<sub>q</sub>), 152.6 (C<sub>q</sub>), 144.2 (CH), 136.1 (CH), 134.3 (CH), 134.1 (C<sub>q</sub>), 133.9 (C<sub>q</sub>), 132.9 (CH), 132.8 (CH), 125.5 (d, *J*<sub>CF</sub> = 10.3 Hz, C<sub>q</sub>), 125.2 (d, *J*<sub>CF</sub> = 10.3 Hz, C<sub>q</sub>), 118.4 (CH), 117.7 (CH), 117.6 (CH), 113.7 (d, *J*<sub>CF</sub> = 9.8 Hz, CH), 113.6 (d, *J*<sub>CF</sub> = 9.9 Hz, CH), 113.5 (C<sub>q</sub>), 113.4 (C<sub>q</sub>), 111.1 (CH), 110.8 (d, *J*<sub>CF</sub> = 25.8 Hz, CH), 110.7 (d, *J*<sub>CF</sub> = 26.0 Hz, CH), 105.5 (d, *J*<sub>CF</sub> = 21.3 Hz, CH), 105.2 (d, *J*<sub>CF</sub> = 21 Hz, CH), 44.2 (CH<sub>3</sub>); MS (ESI<sup>+</sup>): *m/z* = 412.4 [*M*]<sup>+</sup>; anal. calcd. for C<sub>26</sub>H<sub>20</sub>ClF<sub>2</sub>N<sub>3</sub> (447.9): C 69.72, H 4.50, N 9.38; found: C 69.46, H 4.65, N 9.34.

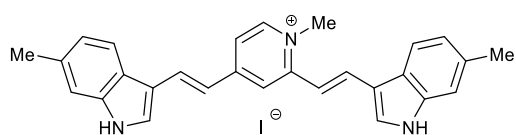

**1-Methyl-2,4-bis((E)-2-(6-methyl-1H-indol-3-yl)vinyl)pyridinium iodide (1r):** Prepared in 54% yield from **I1** and 6-methylindole-3-carbaldehyde, followed by recrystallization from

MeCN–MeOH. Orange crystals, m.p. > 310 °C; <sup>1</sup>H NMR (300 MHz, DMSO): δ 11.73 (br s, 2H), 8.45 (d, *J* = 6.9 Hz, 1H), 8.41 (s, 1H), 8.27–8.12 (m, 2H), 8.12–7.94 (m, 3H), 7.85 (s, 1H), 7.76 (d, *J* = 6.0 Hz, 1H), 7.30 (d, *J* = 3.3 Hz, 2H), 7.23 (d, *J* = 16.3 Hz, 1H), 7.16–7.01 (m, 3H), 4.14 (s, 3H), 2.43 (s, 6H); <sup>13</sup>C NMR (75 MHz, DMSO): δ 152.5 (C<sub>q</sub>), 143.8 (CH), 138.0 (C<sub>q</sub>), 137.9 (C<sub>q</sub>), 136.7 (CH), 134.8 (CH), 132.2 (C<sub>q</sub>), 132.1 (C<sub>q</sub>), 131.6 (CH), 131.4 (CH), 122.8 (CH), 122.7 (C<sub>q</sub>), 122.6 (CH), 120.3 (CH), 120.0 (CH), 117.9 (CH), 117.3 (CH), 117.0 (CH), 113.6 (C<sub>q</sub>), 113.5 (C<sub>q</sub>), 112.4 (2 CH), 110.3 (CH), 44.1 (CH<sub>3</sub>), 21.3 (2 CH<sub>3</sub>); MS (ESI<sup>+</sup>): *m/z* = 404.3 [*M*]<sup>+</sup>; anal. calcd. for C<sub>28</sub>H<sub>26</sub>IN<sub>3</sub> × 0.3 CH<sub>3</sub>CN × 0.3 H<sub>2</sub>O (549.2): C 62.55, H 5.05, N 8.42; found: C 62.50, H 4.97, N 8.63.

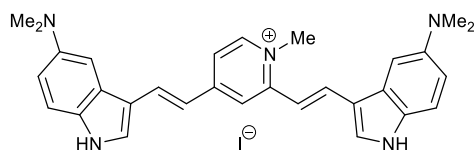

**1-Methyl-2,4-bis((*E*)-2-(5-(dimethylamino)-1*H*-indol-3-yl)vinyl)pyridinium iodide (1s):**

Prepared in 10% yield from **I1** and 6-(dimethyl)indole-3-carbaldehyde [11], followed by recrystallization from MeCN–MeOH. Shiny black crystals, m.p. (decomp.) 146–148 °C; <sup>1</sup>H NMR (300 MHz, DMSO): δ 11.73 (s, 1H), 11.61 (s, 1H), 8.48 (d, *J* = 6.6 Hz, 1H), 8.43 (s, 1H), 8.25 (d, *J* = 15.3 Hz, 1H), 8.21 (d, *J* = 15.7 Hz, 1H), 8.03 (s, 1H), 7.84 (s, 1H), 7.79 (d, *J* = 6.6 Hz, 1H), 7.40–7.28 (m, 4H), 7.13 (d, *J* = 16.1 Hz, 1H), 7.12 (d, *J* = 15.3 Hz, 1H), 6.88 (d, *J* = 8.8 Hz, 2H), 4.17 (s, 3H), 2.97 (s, 12H); <sup>13</sup>C NMR (75 MHz, DMSO): δ 152.5 (C<sub>q</sub>), 152.4 (C<sub>q</sub>), 146.9 (C<sub>q</sub>), 143.7 (CH), 136.6 (CH), 135.0 (CH), 130.9 (C<sub>q</sub>), 130.7 (CH), 130.6 (C<sub>q</sub>), 126.3 (C<sub>q</sub>), 126.2 (C<sub>q</sub>), 117.3 (CH), 116.8 (CH), 116.3 (CH), 113.1 (C<sub>q</sub>), 113.0 (C<sub>q</sub>), 112.8 (CH), 112.7 (CH), 111.9 (CH), 109.5 (CH), 103.2 (CH), 102.6 (CH), 43.8 (CH<sub>3</sub>), 41.9 (CH<sub>3</sub>), 41.6 (CH<sub>3</sub>); MS (ESI<sup>+</sup>): *m/z* = 462.5 [*M*]<sup>+</sup>, 231.8 [*M* + H]<sup>+</sup>; anal. calcd. for C<sub>30</sub>H<sub>32</sub>IN<sub>5</sub> (589.5): C 61.12, H 5.47, N 11.88; found: C 61.73, H 5.87, N 11.63.

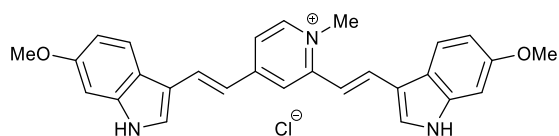

**2,4-Bis((*E*)-2-(6-methoxy-1*H*-indol-3-yl)vinyl)-1-methylpyridinium chloride (1t):**

Prepared in 51% yield from **I1** and 6-methoxyindole-3-carbaldehyde, followed by ion exchange to prepare the chloride salt and recrystallization from MeCN–MeOH. Crimson-red solid, m.p. 305–306 °C; <sup>1</sup>H NMR (300 MHz, DMSO): δ 11.87 (s, 1H), 11.75 (s, 1H), 8.53 (d, *J* = 6.9 Hz, 1H), 8.45 (s, 1H), 8.16 (d, *J* = 15.7 Hz, 1H), 8.15 (d, *J* = 16.2 Hz, 1H), 8.05 (d, *J* = 8.8 Hz, 1H), 8.00 (d, *J* = 8.8 Hz, 1H), 7.95 (d, *J* = 2.6 Hz, 1H), 7.82 (d, *J* = 6.7 Hz, 1H), 7.78 (d, *J* = 2.6 Hz, 1H), 7.24 (d, *J* = 16.3 Hz, 1H), 7.15 (d, *J* = 15.8 Hz, 1H), 7.02 (dd, *J* = 3.7, 2.3 Hz, 2H), 6.93–6.83 (m, 2H), 4.20 (s, 3H), 3.82 (s, 6H); <sup>13</sup>C NMR (75 MHz, DMSO): δ 156.5 (C<sub>q</sub>), 156.4 (C<sub>q</sub>), 152.7 (C<sub>q</sub>), 152.6 (C<sub>q</sub>), 144.0 (CH), 138.6 (C<sub>q</sub>), 138.5 (C<sub>q</sub>), 136.7 (CH), 134.9 (CH), 131.1 (CH),

130.9 (CH), 121.1 (CH), 120.9 (CH), 118.9 (C<sub>q</sub>), 118.8 (C<sub>q</sub>), 118.0 (CH), 117.2 (CH), 117.1 (CH), 113.7 (C<sub>q</sub>), 113.6 (C<sub>q</sub>), 111.0 (CH), 110.8 (CH), 110.4 (CH), 95.6 (2 CH), 55.3 (2 CH<sub>3</sub>), 44.0 (CH<sub>3</sub>). MS (ESI<sup>+</sup>): *m/z* = 436.4 [*M*]<sup>+</sup>; anal. calcd. for C<sub>28</sub>H<sub>26</sub>ClN<sub>3</sub>O<sub>2</sub> × 0.3 H<sub>2</sub>O (477.4): C 70.45, H 5.62, N 8.80; found: C 70.70, H 5.48, N 8.92.

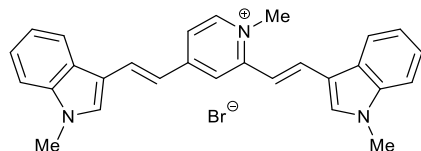

**1-Methyl-2,4-bis((*E*)-2-(1-methyl-1*H*-indol-3-yl)vinyl)pyridinium bromide (1u):** Prepared in 56% yield from **I1** and 1-methylindole-3-carbaldehyde, followed by ion exchange to prepare the bromide salt and recrystallization from MeCN–EtOH. Shiny cherry red needles, m.p. 290–291 °C; <sup>1</sup>H NMR (300 MHz, DMSO): δ 8.52 (d, *J* = 6.9 Hz, 1H), 8.49 (d, *J* = 1.4 Hz, 1H), 8.28–8.13 (m, 4H), 8.12 (s, 1H), 7.91 (s, 1H), 7.83 (dd, *J* = 6.8, 1.6 Hz, 1H), 7.62–7.54 (m, 2H), 7.39–7.23 (m, 5H), 7.18 (d, *J* = 15.8 Hz, 1H), 4.19 (s, 3H), 3.91 (s, 3H), 3.88 (s, 3H); <sup>13</sup>C NMR (75 MHz, DMSO): δ 152.4 (C<sub>q</sub>), 144.0 (CH), 138.0 (C<sub>q</sub>), 137.8 (C<sub>q</sub>), 135.9 (CH), 135.0 (2 CH), 134.1 (CH), 125.5 (C<sub>q</sub>), 125.3 (C<sub>q</sub>), 122.9 (CH), 122.8 (CH), 121.4 (CH), 121.2 (CH), 120.6 (CH), 120.3 (CH), 118.1 (CH), 117.6 (CH), 117.3 (CH), 112.6 (C<sub>q</sub>), 112.5 (C<sub>q</sub>), 111.0 (CH), 110.9 (CH), 110.7 (CH), 44.1 (CH<sub>3</sub>), 33.2 (CH<sub>3</sub>), 33.0 (CH<sub>3</sub>); MS (ESI<sup>+</sup>): *m/z* = 404.4 [*M*]<sup>+</sup>; anal. calcd. for C<sub>28</sub>H<sub>26</sub>BrN<sub>3</sub> × H<sub>2</sub>O (502.5): C 66.93, H 5.62, N 8.36; found: C 67.28, H 6.00, N 8.12.

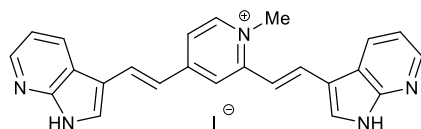

**1-Methyl-2,4-bis((*E*)-2-(7-aza-1*H*-indol-3-yl)vinyl)pyridinium iodide (1v):** Prepared in 40% yield from **I1** and 7-azaindole-3-carboxaldehyde, followed by recrystallization from MeCN. Dark orange solid, m.p. 294–295 °C; <sup>1</sup>H NMR (300 MHz, DMSO): δ 12.42 (s, 2H), 8.68–8.54 (m, 3H), 8.51 (s, 1H), 8.42–8.32 (m, 2H), 8.24 (s, 1H), 8.19 (d, *J* = 16.2 Hz, 2H), 8.05 (s, 1H), 7.87 (d, *J* = 6.1 Hz, 1H), 7.43–7.18 (m, 4H), 4.24 (s, 3H); <sup>13</sup>C NMR (75 MHz, DMSO): δ 152.5 (C<sub>q</sub>), 149.7 (C<sub>q</sub>), 144.4 (CH), 144.2 (CH), 144.1 (CH), 136.1 (CH), 134.3 (CH), 132.1 (CH), 131.7 (C<sub>q</sub>), 128.9 (CH), 128.7 (CH), 118.6 (2 CH), 118.0 (CH), 117.3 (C<sub>q</sub>), 117.2 (CH), 117.1 (CH), 112.2 (C<sub>q</sub>), 112.1 (C<sub>q</sub>), 112.0 (CH), 44.4 (CH<sub>3</sub>); MS (ESI<sup>+</sup>): *m/z* = 378.4 [*M*]<sup>+</sup>, 189.8 [*M* + H]<sup>2+</sup>; anal. calcd. for C<sub>24</sub>H<sub>20</sub>IN<sub>5</sub> × 0.5 H<sub>2</sub>O (514.4): C 56.04, H 4.12, N 13.62; found: C 56.28, H 4.12, N 13.98.

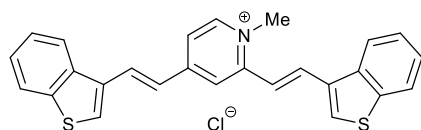

**1-Methyl-2,4-bis((*E*)-2-(1-benzothiophen-3-yl)vinyl)pyridinium chloride (1w):** Prepared in 20% yield from **I1** and 1-benzothiophene-3-carbaldehyde, followed by ion exchange to

prepare the chloride salt and recrystallization from MeCN–MeOH. Wine-red solid, m.p. 243–244 °C; <sup>1</sup>H NMR (300 MHz, DMSO): δ 8.87 (s, 1H), 8.84 (d, *J* = 6.7 Hz, 1H), 8.67 (s, 1H), 8.51–8.39 (m, 4H), 8.35 (d, *J* = 16.0 Hz, 1H), 8.21 (d, *J* = 6.8 Hz, 1H), 8.17–8.09 (m, 2H), 7.71 (d, *J* = 16.0 Hz, 1H), 7.66–7.46 (m, 5H), 4.34 (s, 3H); <sup>13</sup>C NMR (75 MHz, DMSO): δ 152.1 (C<sub>q</sub>), 151.9 (C<sub>q</sub>), 145.5 (CH), 134.0 (C<sub>q</sub>), 139.8 (C<sub>q</sub>), 137.2 (C<sub>q</sub>), 137.1 (C<sub>q</sub>), 133.6 (CH), 132.4 (C<sub>q</sub>), 132.1 (C<sub>q</sub>), 132.0 (CH), 129.6 (CH), 129.1 (CH), 125.4 (CH), 125.3 (CH), 125.2 (CH), 125.1 (CH), 124.2 (CH), 123.4 (2 CH), 122.7 (CH), 122.5 (CH), 121.4 (CH), 120.9 (CH), 118.6 (CH), 45.1 (CH<sub>3</sub>); MS (ESI<sup>+</sup>): *m/z* = 410.3 [*M*]<sup>+</sup>; anal. calcd. for C<sub>26</sub>H<sub>20</sub>CINS<sub>2</sub> × 0.5 H<sub>2</sub>O (455.0): C 68.63, H 4.65, N 3.08; found: C 68.69, H 4.58, N 3.27.

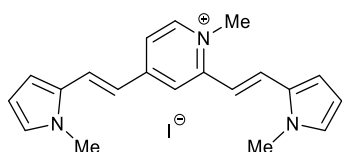

**1-Methyl-2,4-bis((*E*)-2-(1-methylpyrrol-2-yl)vinyl)pyridinium iodide (1x):** Prepared in 65% yield from **I1** and 1-methylpyrrole-2-carboxaldehyde, followed by recrystallization from MeOH. Shiny green crystals, m.p. 264–266 °C; <sup>1</sup>H NMR (300 MHz, DMSO): δ 8.54 (d, *J* = 6.9 Hz, 1H), 8.40 (d, *J* = 1.7 Hz, 1H), 7.92 (dd, *J* = 6.8, 1.8 Hz, 1H), 7.86 (d, *J* = 16.0 Hz, 1H), 7.83 (d, *J* = 15.5 Hz, 1H), 7.14–6.99 (m, 5H), 6.82 (dd, *J* = 3.9, 1.5 Hz, 1H), 6.23 (dd, *J* = 3.9, 2.6 Hz, 1H), 6.20 (dd, *J* = 3.9, 2.6 Hz, 1H), 4.14 (s, 3H), 3.84 (s, 3H), 3.81 (s, 3H); <sup>13</sup>C NMR (75 MHz, DMSO): δ 152.0 (C<sub>q</sub>), 151.8 (C<sub>q</sub>), 144.2 (CH), 130.5 (C<sub>q</sub>), 130.3 (CH), 128.7 (CH), 128.2 (CH), 128.1 (CH), 119.3 (CH), 118.0 (CH), 117.7 (CH), 112.9 (CH), 111.4 (CH), 111.3 (CH), 109.8 (CH), 109.7 (CH), 44.3 (CH<sub>3</sub>), 34.2 (CH<sub>3</sub>), 34.1 (CH<sub>3</sub>); MS (ESI<sup>+</sup>): *m/z* = 304.3 [*M*]<sup>+</sup>; anal. calcd. for C<sub>20</sub>H<sub>22</sub>IN<sub>3</sub> (431.3): C 55.69, H 5.14, N 9.74; found: C 55.67, H 5.21, N 9.82.

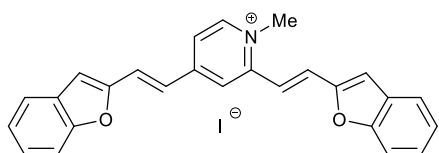

**1-Methyl-2,4-bis((*E*)-2-(1-benzofuran-2-yl)vinyl)pyridinium iodide (1z):** Prepared in 62% yield from **I1** and 1-benzofuran-2-carbaldehyde, followed by recrystallization from MeCN–H<sub>2</sub>O. Dark-yellow crystals, m.p. > 280 °C; <sup>1</sup>H NMR (300 MHz, DMSO): δ 8.86 (d, *J* = 6.7 Hz, 1H), 8.76 (s, 1H), 8.23–8.03 (m, 3H), 7.84–7.73 (m, 2H), 7.68 (d, *J* = 8.3 Hz, 1H), 7.64 (d, *J* = 8.3 Hz, 1H), 7.52–7.39 (m, 5H), 7.39–7.27 (m, 3H), 4.32 (s, 3H); <sup>13</sup>C NMR (75 MHz, DMSO): δ 155.1 (C<sub>q</sub>), 155.0 (C<sub>q</sub>), 153.0 (C<sub>q</sub>), 152.6 (C<sub>q</sub>), 150.9 (C<sub>q</sub>), 145.9 (CH), 128.9 (CH), 128.3 (C<sub>q</sub>), 128.2 (C<sub>q</sub>), 127.2 (CH), 127.1 (CH), 126.9 (CH), 123.9 (CH), 123.8 (CH), 123.7 (CH), 122.4 (CH), 122.3 (CH), 121.7 (CH), 121.4 (CH), 117.9 (CH), 112.4 (CH), 111.6 (CH), 111.4 (CH), 111.2 (CH), 45.1 (CH<sub>3</sub>); MS (ESI<sup>+</sup>): *m/z* = 378.3 [*M*]<sup>+</sup>; anal. calcd. for C<sub>26</sub>H<sub>20</sub>INO<sub>2</sub> (505.3): C 61.79, H 3.99, N 2.77; found: C 61.72, H 4.13, N 2.77.



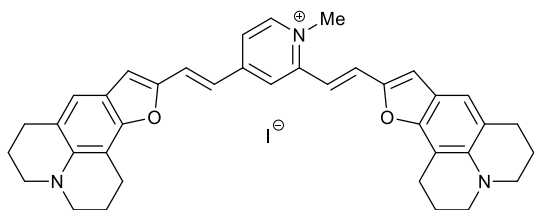

**2,4-Bis((E)-2-(2,3,6,7-tetrahydro-1H,5H-furo[2,3-f]pyrido[3,2,1-ij]quinolin-10-yl)vinyl)-1-methylpyridinium iodide (1b):** Prepared in 54% yield from **I1** and 2,3,6,7-tetrahydro-1H,5H-furo[2,3-f]pyrido[3,2,1-ij]quinoline-10-carboxaldehyde [12], followed by recrystallization from MeOH–MeCN. Black solid, m.p. 237–238 °C; <sup>1</sup>H NMR (300 MHz, DMSO): δ 8.54 (d, *J* = 6.8 Hz, 1H), 8.41 (s, 1H), 7.99–7.71 (m, 3H), 7.16 (s, 1H), 7.08–6.91 (m, 5H), 4.14 (s, 3H), 3.30–3.10 (m, 8H), 2.96–2.81 (m, 4H), 2.81–2.71 (m, 4H), 2.04–1.80 (m, 8H); <sup>13</sup>C NMR (75 MHz, DMSO): δ 154.1 (C<sub>q</sub>), 153.9 (C<sub>q</sub>), 150.9 (C<sub>q</sub>), 150.6 (C<sub>q</sub>), 150.3 (C<sub>q</sub>), 150.0 (C<sub>q</sub>), 144.5 (CH), 142.9 (C<sub>q</sub>), 142.7 (C<sub>q</sub>), 128.6 (CH), 126.7 (CH), 119.8 (C<sub>q</sub>), 119.6 (CH + C<sub>q</sub>), 119.4 (CH), 118.9 (CH), 118.7 (CH), 118.6 (CH), 117.1 (C<sub>q</sub>), 117.0 (C<sub>q</sub>), 114.3 (CH), 113.3 (CH), 112.3 (CH), 102.1 (C<sub>q</sub>), 102.0 (C<sub>q</sub>), 49.5 (CH<sub>2</sub>), 49.2 (CH<sub>2</sub>), 44.2 (CH<sub>3</sub>), 27.7 (CH<sub>2</sub>), 21.5 (CH<sub>2</sub>), 21.4 (CH<sub>2</sub>), 20.3 (CH<sub>2</sub>); MS (ESI<sup>+</sup>): *m/z* = 568.5 [*M*]<sup>+</sup>, 284.5 [*M* + H]<sup>2+</sup>; anal. calcd. for C<sub>38</sub>H<sub>38</sub>IN<sub>3</sub>O<sub>2</sub> × 0.5 H<sub>2</sub>O (704.7): C 64.77, H 5.58, N 5.96; found: C 64.68, H 5.48, N 5.72.

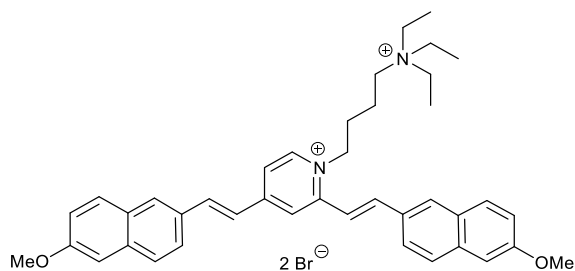

**2,4-Bis((E)-2-(6-methoxynaphthalen-2-yl)vinyl)-1-(4-(triethylammonio)butyl)pyridinium dibromide (2i):** Prepared in 37% yield from **I2** [2] and 6-methoxy-2-naphthaldehyde, followed by recrystallization from EtOH. Dark yellow solid, m.p. 227–228 °C; <sup>1</sup>H NMR (300 MHz, DMSO): δ 8.92 (d, *J* = 6.7 Hz, 1H), 8.76 (s, 1H), 8.35 (s, 1H), 8.30 (d, *J* = 16.4 Hz, 1H), 8.25–8.07 (m, 4H), 8.06–7.83 (m, 5H), 7.72 (d, *J* = 15.8 Hz, 1H), 7.62 (d, *J* = 16.3 Hz, 1H), 7.43 (dd, *J* = 5.8, 2.3 Hz, 2H), 7.32–7.20 (m, 2H), 4.91–4.76 (m, 2H), 3.93 (s, 3H), 3.92 (s, 3H), 3.30–3.19 (m, 8H), 1.99–1.75 (m, 4H), 1.18 (t, *J* = 6.9 Hz, 9H); <sup>13</sup>C NMR (75 MHz, DMSO): δ 158.7 (C<sub>q</sub>), 158.6 (C<sub>q</sub>), 152.3 (C<sub>q</sub>), 151.6 (C<sub>q</sub>), 145.0 (CH), 143.2 (CH), 140.7 (CH), 135.6 (C<sub>q</sub>), 135.4 (C<sub>q</sub>), 130.8 (C<sub>q</sub>), 130.5 (C<sub>q</sub>), 130.3 (CH), 130.2 (CH), 130.1 (CH), 129.6 (CH), 128.3 (C<sub>q</sub>), 128.2 (C<sub>q</sub>), 127.8 (CH), 127.6 (CH), 125.0 (CH), 124.1 (CH), 122.7 (CH), 121.5 (CH), 121.2 (CH), 119.5 (2 CH), 116.5 (CH), 106.4 (CH), 55.9 (CH<sub>2</sub>), 55.4 (2 CH<sub>3</sub>), 52.2 (CH<sub>2</sub>), 26.7 (CH<sub>2</sub>), 18.2 (CH<sub>2</sub>), 7.3 (CH<sub>3</sub>); MS (ESI<sup>+</sup>): *m/z* = 713.7 [*M* + CF<sub>3</sub>COO<sup>-</sup>]<sup>+</sup>, 300.4 [*M*]<sup>2+</sup>; anal. calcd. for C<sub>41</sub>H<sub>48</sub>Br<sub>2</sub>N<sub>2</sub>O<sub>2</sub> × 0.5 H<sub>2</sub>O (769.7): C 63.98, H 6.42, N 3.64; found: C 63.74, H 6.54, N 3.92.

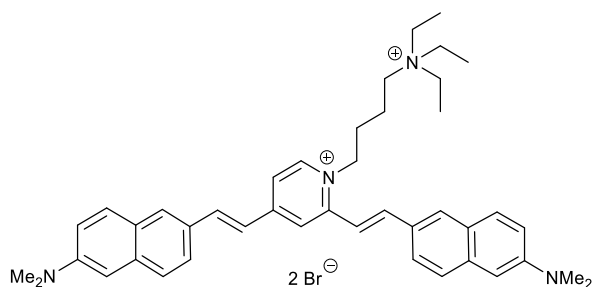

**2,4-Bis((E)-2-(6-(dimethylamino)naphthalen-2-yl)vinyl)-1-(4-(triethylammonio)butyl)pyridinium dibromide (2n):**

Prepared in a 54% yield from **I2** and 6-dimethylamino-2-naphthaldehyde, followed by recrystallization from EtOH. Cherry-red solid, m.p. 251–252 °C; <sup>1</sup>H NMR (300 MHz, DMSO): δ 8.80 (d, *J* = 6.7 Hz, 1H), 8.66 (s, 1H), 8.21 (d, *J* = 16.2 Hz, 1H), 8.18–8.08 (m, 2H), 8.07–7.96 (m, 3H), 7.88–7.71 (m, 5H), 7.57 (d, *J* = 15.8 Hz, 1H), 7.49 (d, *J* = 16.3 Hz, 1H), 7.33–7.22 (m, 2H), 7.03–6.96 (m, 2H), 4.77 (t, *J* = 6.3 Hz, 2H), 3.30–3.17 (m, 8H), 3.08 (s, 6H), 3.07 (s, 6H), 1.97–1.70 (m, 4H), 1.18 (t, *J* = 6.9 Hz, 9H); <sup>13</sup>C NMR (75 MHz, DMSO): δ 152.2 (C<sub>q</sub>), 151.5 (C<sub>q</sub>), 149.6 (C<sub>q</sub>), 149.5 (C<sub>q</sub>), 144.6 (CH), 143.5 (CH), 141.0 (CH), 136.0 (C<sub>q</sub>), 135.9 (C<sub>q</sub>), 130.6 (CH), 130.1 (CH), 129.7 (CH), 129.6 (CH), 128.6 (C<sub>q</sub>), 128.4 (C<sub>q</sub>), 126.9 (CH), 126.6 (CH), 125.5 (C<sub>q</sub>), 125.4 (C<sub>q</sub>), 124.7 (CH), 123.8 (CH), 121.0 (CH), 120.8 (CH), 120.2 (CH), 116.5 (CH), 114.5 (CH), 105.5 (CH), 105.4 (CH), 55.6 (CH<sub>2</sub>), 55.5 (CH<sub>2</sub>), 52.2 (CH<sub>2</sub>), 40.0 (CH<sub>3</sub>), 26.7 (CH<sub>2</sub>), 18.2 (CH<sub>2</sub>), 7.3 (CH<sub>3</sub>); MS (ESI<sup>+</sup>): *m/z* = 713.7 [*M* + CF<sub>3</sub>COO<sup>-</sup>]<sup>+</sup>, 300.4 [*M*]<sup>2+</sup>; anal. calcd. for C<sub>43</sub>H<sub>54</sub>Br<sub>2</sub>N<sub>4</sub> × 0.5 H<sub>2</sub>O (795.7): C 64.90, H 6.97, N 7.04; found: C 64.61, H 7.18, N 7.28.

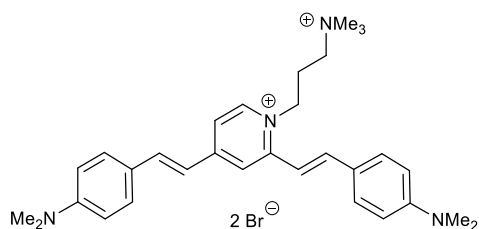

**2,4-Bis((E)-4-(dimethylamino)styryl)-1-(3-(trimethylammonio)propyl)pyridinium dibromide (3a):**

Prepared in 51% yield from **I3** and 4-(dimethylamino)benzaldehyde, followed by recrystallization from EtOH. Black solid, m.p. 241–242 °C; <sup>1</sup>H NMR (300 MHz, DMSO): δ 8.63 (d, *J* = 6.9 Hz, 1H), 8.44 (s, 1H), 7.99 (d, *J* = 16.1 Hz, 1H), 7.98 (d, *J* = 15.5 Hz, 1H), 7.86 (d, *J* = 6.8 Hz, 1H), 7.79 (d, *J* = 8.9 Hz, 2H), 7.61 (d, *J* = 8.9 Hz, 2H), 7.22 (d, *J* = 15.5 Hz, 1H), 7.16 (d, *J* = 16.1 Hz, 1H), 6.80 (d, *J* = 8.9 Hz, 2H), 6.79 (d, *J* = 8.9 Hz, 2H), 4.66 (t, *J* = 7.1 Hz, 2H), 3.63–3.47 (m, 2H), 3.10 (s, 9H), 3.04 (s, 6H), 3.02 (s, 6H), 2.38–2.19 (m, 2H); <sup>13</sup>C NMR (75 MHz, DMSO): δ 152.3 (C<sub>q</sub>), 152.0 (C<sub>q</sub>), 151.8 (C<sub>q</sub>), 151.7 (C<sub>q</sub>), 143.8 (CH), 143.7 (CH), 141.1 (CH), 130.7 (CH), 129.9 (CH), 122.8 (C<sub>q</sub>), 122.5 (C<sub>q</sub>), 119.5 (CH), 118.6 (CH), 117.6 (CH), 112.0 (CH), 111.8 (CH), 110.5 (CH), 61.9 (CH<sub>2</sub>), 52.5 (CH<sub>2</sub> + CH<sub>3</sub>), 39.7 (CH<sub>3</sub>), 23.3 (CH<sub>2</sub>); MS (ESI<sup>+</sup>): *m/z* = 583.6 [*M* + CF<sub>3</sub>COO<sup>-</sup>]<sup>+</sup>, 235.4 [*M*]<sup>2+</sup>; anal. calcd. for C<sub>31</sub>H<sub>42</sub>Br<sub>2</sub>N<sub>4</sub> × 2 H<sub>2</sub>O (666.5): C 55.86, H 6.96, N 8.41; found: C 55.59, H 6.98, N 8.22.

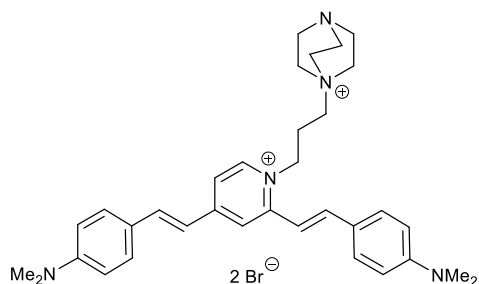

**2,4-Bis((E)-4-(dimethylamino)styryl)-1-(3-(4-aza-1-**

**azoniabicyclo[2.2.2]octyl)propyl)pyridinium dibromide (4a):** Prepared in 62% yield from **I4** and 4-(dimethylamino)benzaldehyde, followed by recrystallization from MeOH. Black solid, m.p. 247–248 °C; <sup>1</sup>H NMR (300 MHz, DMSO): δ 8.63 (d, *J* = 6.9 Hz, 1H), 8.44 (s, 1H), 7.98 (d, *J* = 16.2 Hz, 2H), 7.86 (d, *J* = 6.8 Hz, 1H), 7.79 (d, *J* = 8.6 Hz, 2H), 7.60 (d, *J* = 8.6 Hz, 2H), 7.28–7.10 (m, 2H), 6.80 (d, *J* = 8.8 Hz, 4H), 4.66 (t, *J* = 6.5 Hz, 2H), 3.50–3.38 (m, 2H), 3.30–3.22 (m, 6H), 3.04 (s, 6H), 3.02 (s, 6H), 3.09–2.95 (m, 6H), 2.36–2.20 (m, 2H); <sup>13</sup>C NMR (75 MHz, DMSO): δ 152.3 (C<sub>q</sub>), 152.0 (C<sub>q</sub>), 151.8 (C<sub>q</sub>), 151.7 (C<sub>q</sub>), 143.8 (CH), 143.7 (CH), 141.1 (CH), 130.8 (CH), 129.9 (CH), 122.7 (C<sub>q</sub>), 122.5 (C<sub>q</sub>), 119.4 (CH), 118.6 (CH), 117.6 (CH), 112.0 (CH), 111.8 (CH), 110.5 (CH), 59.8 (CH<sub>2</sub>), 52.6 (CH<sub>2</sub>), 51.8 (CH<sub>2</sub>), 44.7 (CH<sub>2</sub>), 39.8 (CH<sub>3</sub>), 22.3 (CH<sub>2</sub>); MS (ESI<sup>+</sup>): *m/z* = 636.6 [*M* + CF<sub>3</sub>COO<sup>-</sup>]<sup>+</sup>, 261.9 [*M*]<sup>2+</sup>; anal. calcd. for C<sub>31</sub>H<sub>45</sub>Br<sub>2</sub>N<sub>5</sub> × 2.5 H<sub>2</sub>O (728.6): C 56.05, H 6.92, N 9.61; found: C 56.18, H 6.88, N 9.52.

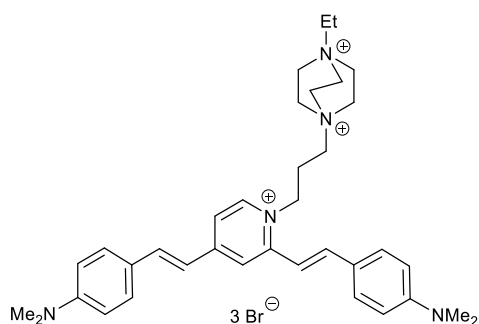

**2,4-Bis((E)-4-(dimethylamino)styryl)-1-(3-(4-ethyl-1,4-diazoniabicyclo[2.2.2]octyl)-**  
**propyl)pyridinium tribromide (5a):** Prepared in 13% yield from **I5** and 4-

(dimethylamino)benzaldehyde, followed by recrystallization from CHCl<sub>3</sub>–EtOH. Black solid, m.p. 248–249 °C; <sup>1</sup>H NMR (300 MHz, DMSO): δ 8.67 (d, *J* = 6.9 Hz, 1H), 8.46 (s, 1H), 8.00 (d, *J* = 16.3 Hz, 2H), 7.87 (d, *J* = 7.1 Hz, 1H), 7.83 (d, *J* = 8.8 Hz, 2H), 7.61 (d, *J* = 8.8 Hz, 2H), 7.29–7.02 (m, 2H), 6.85–6.73 (m, 4H), 4.71 (t, *J* = 6.7 Hz, 2H), 4.05–3.76 (m, 14H), 3.62 (q, *J* = 7.1 Hz, 2H), 3.04 (s, 6H), 3.02 (s, 6H), 2.43–2.29 (m, 2H), 1.28 (t, *J* = 7.1 Hz, 3H); <sup>13</sup>C NMR (75 MHz, DMSO): δ 152.3 (C<sub>q</sub>), 152.0 (C<sub>q</sub>), 151.9 (C<sub>q</sub>), 151.8 (C<sub>q</sub>), 143.8 (CH), 143.7 (CH), 141.1 (CH), 130.9 (CH), 129.9 (CH), 122.7 (C<sub>q</sub>), 122.5 (C<sub>q</sub>), 119.4 (CH), 118.5 (CH), 117.6 (CH), 112.0 (CH), 111.7 (CH), 110.4 (CH), 60.1 (CH<sub>2</sub>), 59.2 (CH<sub>2</sub>), 52.2 (CH<sub>2</sub>), 50.7 (CH<sub>2</sub>), 49.9 (CH<sub>2</sub>), 39.7 (2 CH<sub>3</sub>), 22.7 (CH<sub>2</sub>), 7.5 (CH<sub>3</sub>); MS (ESI<sup>+</sup>): *m/z* = 778.6 [*M* + 2 CF<sub>3</sub>COO<sup>-</sup>]<sup>+</sup>,

332.9  $[M + CF_3COO^-]^{2+}$ , 275.9  $[M - H]^{2+}$ , 261.8  $[M - Et]^{2+}$ ; anal. calcd. for  $C_{36}H_{50}Br_3N_5 \times H_2O$  (810.6): C 53.35, H 6.47, N 8.64; found: C 53.45, H 6.61, N 8.64.

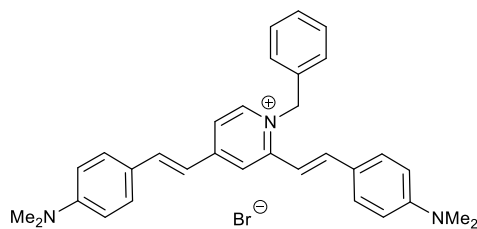

**1-Benzyl-2,4-bis((E)-4-(dimethylamino)styryl)pyridinium bromide (6a):** A mixture of 2,4-bis((E)-4-dimethylaminostyryl)pyridine [13] (280 mg, 758  $\mu$ mol) and benzyl bromide (0.18 mL, 260 mg, 1.52 mmol) in MeCN (7 mL) was heated at reflux for 16 h. After cooling, the precipitated solid was collected, washed with MeCN and recrystallized from  $CHCl_3$ –EtOH, to give **6a** (230 mg, 56%) as dark-red crystals, m.p. 243–244 °C;  $^1H$  NMR (300 MHz, DMSO):  $\delta$  8.76 (d,  $J = 6.7$  Hz, 1H), 8.39 (s, 1H), 7.96 (d,  $J = 16.1$  Hz, 1H), 7.88 (d,  $J = 6.6$  Hz, 1H), 7.81 (d,  $J = 15.6$  Hz, 1H), 7.68–7.47 (m, 4H), 7.46–7.25 (m, 5H), 7.18 (d,  $J = 15.7$  Hz, 1H), 7.16 (d,  $J = 16.0$  Hz, 1H), 6.89–6.68 (m, 4H), 5.90 (s, 2H), 3.02 (s, 12H);  $^{13}C$  NMR (75 MHz, DMSO):  $\delta$  152.5 ( $C_q$ ), 152.0 ( $C_q$ ), 151.9 ( $C_q$ ), 151.8 ( $C_q$ ), 144.4 (CH), 142.8 (CH), 141.2 (CH), 135.1 ( $C_q$ ), 130.3 (CH), 129.9 (CH), 129.1 (CH), 128.4 (CH), 127.1 (CH), 122.8 ( $C_q$ ), 122.4 ( $C_q$ ), 119.5 (CH), 118.6 (CH), 117.7 (CH), 112.1 (CH), 111.9 (CH), 111.3 (CH), 58.5 ( $CH_2$ ), 39.8 ( $CH_3$ ), 39.7 ( $CH_3$ ); MS (ESI $^+$ ):  $m/z = 460.5 [M]^+$ ; anal. calcd. for  $C_{32}H_{34}BrN_3 \times 0.5 H_2O$  (549.5): C 69.94, H 6.42, N 7.65; found: C 69.70, H 6.34, N 7.60.

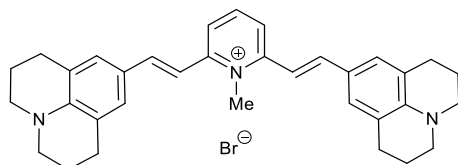

**2,6-Bis((E)-2-(julolidin-9-yl)vinyl)-1-methylpyridinium bromide (7b):** Prepared in 77% yield from **17** and julolidine-9-carbaldehyde, followed by ion exchange to prepare the bromide salt and recrystallization from MeOH. Crimson-red solid, m.p. > 310 °C;  $^1H$  NMR (300 MHz, DMSO):  $\delta$  8.11 (t,  $J = 7.8$  Hz, 1H), 7.97 (d,  $J = 8.0$  Hz, 2H), 7.54 (d,  $J = 15.6$  Hz, 2H), 7.24 (s, 4H), 7.15 (d,  $J = 15.7$  Hz, 2H), 4.12 (s, 3H), 3.29–3.16 (m, 8H), 2.71 (br s, 8H), 1.88 (br s, 8H);  $^{13}C$  NMR (75 MHz, DMSO):  $\delta$  153.6 ( $C_q$ ), 144.9 ( $C_q$ ), 143.0 (CH), 140.8 (CH), 127.9 (CH), 121.5 ( $C_q$ ), 120.6 ( $C_q$ ), 120.2 (CH), 111.4 (CH), 49.3 ( $CH_2$ ), 40.7 ( $CH_3$ ), 27.1 ( $CH_2$ ), 21.0 ( $CH_2$ ); MS (ESI $^+$ ):  $m/z = 488.6 [M]^+$ , 244.4  $[M + H]^{2+}$ ; anal. calcd. for  $C_{34}H_{38}BrN_3 \times H_2O$  (586.6): C 69.61, H 6.87, N 7.16; found: C 69.69, H 6.20, N 6.91.

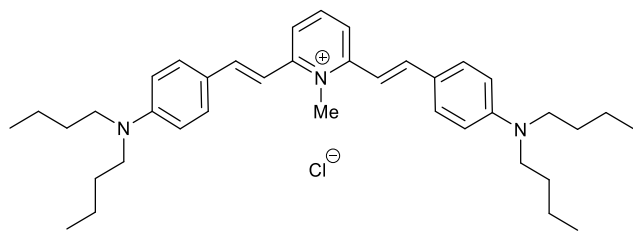

**2,6-Bis((E)-4-(dibutylamino)styryl)-1-methylpyridinium chloride (7d):** Prepared in 51% yield from **17** and 4-(dibutylamino)benzaldehyde, followed by ion exchange to prepare the chloride salt and recrystallization from MeCN. Cherry red solid, m.p. 184–185 °C;  $^1\text{H}$  NMR (300 MHz, DMSO):  $\delta$  8.17 (t,  $J = 7.9$  Hz, 1H), 8.05 (d,  $J = 7.9$  Hz, 2H), 7.78–7.55 (m, 6H), 7.25 (d,  $J = 15.7$  Hz, 2H), 6.71 (d,  $J = 8.8$  Hz, 4H), 4.16 (s, 3H), 3.46–3.30 (m, 8H), 1.61–1.43 (m, 8H), 1.34 (dq,  $J = 14.3, 7.2$  Hz, 8H), 0.93 (t,  $J = 7.2$  Hz, 12H);  $^{13}\text{C}$  NMR (75 MHz, DMSO):  $\delta$  153.6 ( $\text{C}_q$ ), 149.7 ( $\text{C}_q$ ), 142.7 (CH), 141.2 (CH), 130.6 (CH), 121.8 ( $\text{C}_q$ ), 120.8 (CH), 112.2 (CH), 111.3 (CH), 49.8 ( $\text{CH}_2$ ), 40.9 ( $\text{CH}_3$ ), 29.0 ( $\text{CH}_2$ ), 19.6 ( $\text{CH}_2$ ), 13.9 ( $\text{CH}_3$ ); MS (ESI $^+$ ):  $m/z = 552.7 [M]^+$ ; anal. calcd. for  $\text{C}_{38}\text{H}_{54}\text{ClN}_3 \times 1.5 \text{H}_2\text{O}$  (615.3): C 74.17, H 9.34, N 6.83; found: C 74.22, H 9.42, N 6.81.

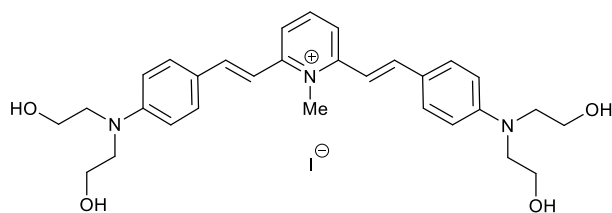

**2,6-Bis((E)-4-(bis(2-hydroxyethyl)amino)styryl)-1-methylpyridinium iodide (7e):** Prepared in 55% yield from **17** and 4-[bis(2-hydroxyethyl)amino]benzaldehyde, followed by recrystallization from MeOH. Dark-red crystals, m.p. 138–140 °C;  $^1\text{H}$  NMR (300 MHz, DMSO):  $\delta$  8.18 (t,  $J = 7.9$  Hz, 1H), 8.06 (d,  $J = 7.9$  Hz, 2H), 7.75–7.58 (m, 6H), 7.27 (d,  $J = 15.7$  Hz, 2H), 6.79 (d,  $J = 8.5$  Hz, 4H), 4.80 (br s, 4H, OH), 4.18 (s, 3H), 3.65–3.43 (m, 16H);  $^{13}\text{C}$  NMR (75 MHz, DMSO):  $\delta$  153.7 ( $\text{C}_q$ ), 150.2 ( $\text{C}_q$ ), 142.7 (CH), 141.4 (CH), 130.5 (CH), 122.2 ( $\text{C}_q$ ), 121.0 (CH), 112.5 (CH), 111.5 (CH), 58.2 ( $\text{CH}_2$ ), 53.2 ( $\text{CH}_2$ ), 41.0 ( $\text{CH}_3$ ); MS (ESI $^+$ ):  $m/z = 504.5 [M]^+$ , 252.8 [ $M + \text{H}$ ] $^{2+}$ , 243.8 [ $M - \text{H}_2\text{O} + \text{H}$ ] $^{2+}$ ; anal. calcd. for  $\text{C}_{30}\text{H}_{38}\text{I}_3\text{N}_3\text{O}_4 \times \text{H}_2\text{O}$  (649.6): C 55.47, H 6.21, N 6.47; found: C 55.51, H 6.10, N 6.33.

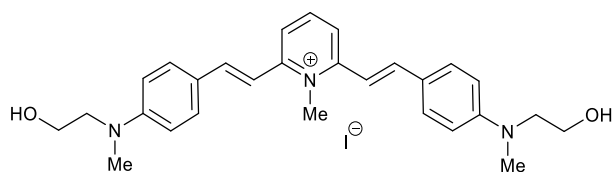

**2,6-Bis((E)-4-((2-hydroxyethyl)(methyl)amino)styryl)-1-methylpyridinium iodide (7f):** Prepared in 39% yield from **17** and *N*-methyl-*N*-(2-hydroxyethyl)-4-aminobenzaldehyde, followed by recrystallization from MeCN–MeOH. Black solid, m.p. 244–245 °C;  $^1\text{H}$  NMR (300 MHz, DMSO):  $\delta$  8.18 (t,  $J = 8.1$  Hz, 1H), 8.06 (d,  $J = 8.1$  Hz, 2H), 7.73–7.60 (m, 6H), 7.28 (d,

$J = 15.7$  Hz, 2H), 6.78 (d,  $J = 8.7$  Hz, 4H), 4.75 (t,  $J = 5.1$  Hz, 2H, OH), 4.18 (s, 3H), 3.63–3.54 (m, 4H), 3.54–3.45 (m, 4H), 3.03 (s, 6H);  $^{13}\text{C}$  NMR (75 MHz, DMSO):  $\delta$   $^{13}\text{C}$  NMR (75 MHz, DMSO)  $\delta$  153.6 (C<sub>q</sub>), 151.0 (C<sub>q</sub>), 142.8 (CH), 141.3 (CH), 130.4 (CH), 122.3 (C<sub>q</sub>), 121.0 (CH), 112.5 (CH), 111.5 (CH), 58.2 (CH<sub>2</sub>), 53.9 (CH<sub>2</sub>), 41.0 (CH<sub>3</sub>), 38.8 (CH<sub>3</sub>); MS (ESI<sup>+</sup>):  $m/z = 444.4$  [ $M$ ]<sup>+</sup>, 222.8 [ $M + H$ ]<sup>2+</sup>, 213.8 [ $M - \text{H}_2\text{O} + H$ ]<sup>2+</sup>; anal. calcd. for C<sub>28</sub>H<sub>34</sub>IN<sub>3</sub>O<sub>2</sub> (571.5): C 58.85, H 6.00, N 7.35; found: C 58.68, H 5.95, N 7.34.

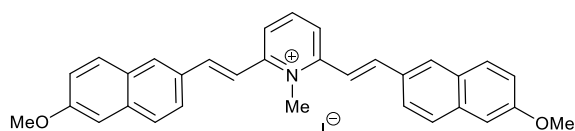

**2,6-Bis((E)-2-(6-methoxynaphthalen-2-yl)vinyl)-1-methylpyridinium iodide (7i):** Prepared in 35% yield from **I7** and 6-methoxy-2-naphthaldehyde, followed by recrystallization from MeNO<sub>2</sub>. Orange crystalline solid, m.p. 250 °C (decomp.);  $^1\text{H}$  NMR (300 MHz, DMSO):  $\delta$  8.44 (t,  $J = 8.0$  Hz, 1H), 8.30 (d,  $J = 8.0$  Hz, 2H), 8.23 (s, 2H), 8.09 (d,  $J = 8.7$  Hz, 2H), 7.96–7.85 (m, 6H), 7.73 (d,  $J = 15.9$  Hz, 2H), 7.41 (d,  $J = 2.3$  Hz, 2H), 7.24 (dd,  $J = 9.0, 2.5$  Hz, 2H), 4.33 (s, 3H), 3.90 (s, 6H);  $^{13}\text{C}$  NMR (75 MHz, DMSO):  $\delta$  158.6 (C<sub>q</sub>), 153.3 (C<sub>q</sub>), 142.8 (CH), 142.6 (CH), 135.4 (C<sub>q</sub>), 130.5 (C<sub>q</sub>), 130.2 (CH), 129.9 (CH), 128.2 (C<sub>q</sub>), 127.5 (CH), 124.8 (CH), 123.5 (CH), 119.4 (CH), 118.2 (CH), 106.4 (CH), 55.4 (CH<sub>3</sub>), 41.7 (CH<sub>3</sub>); MS (ESI<sup>+</sup>):  $m/z = 458.4$  [ $M$ ]<sup>+</sup>; anal. calcd. for C<sub>32</sub>H<sub>28</sub>INO<sub>2</sub> (585.5): C 65.65, H 4.82, N 2.39; found: C 65.42, H 5.04, N 2.23.

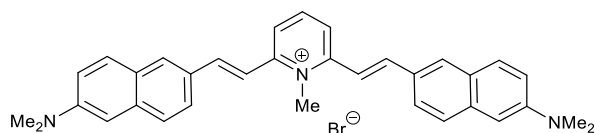

**2,6-Bis((E)-2-(6-(dimethylamino)naphthalen-2-yl)vinyl)-1-methylpyridinium bromide (7n):** Prepared in 54% yield from **I7** and 6-dimethylamino-2-naphthaldehyde, followed by ion exchange to prepare the bromide salt and recrystallization from MeOH. Dark-green crystals, m.p. 278–279 °C;  $^1\text{H}$  NMR (300 MHz, DMSO):  $\delta$  8.35 (t,  $J = 8.0$  Hz, 1H), 8.22 (d,  $J = 8.0$  Hz, 2H), 8.07 (s, 2H), 7.95 (dd,  $J = 8.8, 1.2$  Hz, 2H), 7.90–7.78 (m, 4H), 7.74 (d,  $J = 8.8$  Hz, 2H), 7.59 (d,  $J = 15.8$  Hz, 2H), 7.26 (dd,  $J = 9.2, 2.4$  Hz, 2H), 6.97 (d,  $J = 2.2$  Hz, 2H), 4.27 (s, 3H), 3.06 (s, 12H);  $^{13}\text{C}$  NMR (75 MHz, DMSO):  $\delta$  153.4 (C<sub>q</sub>), 149.5 (C<sub>q</sub>), 142.9 (CH), 142.2 (CH), 135.9 (C<sub>q</sub>), 130.3 (CH), 129.6 (CH), 128.4 (C<sub>q</sub>), 126.6 (CH), 125.4 (C<sub>q</sub>), 124.4 (CH), 122.6 (CH), 116.5 (CH), 116.4 (CH), 105.4 (CH), 41.4 (CH<sub>3</sub>), 40.03 (CH<sub>3</sub>); MS (ESI<sup>+</sup>):  $m/z = 484.5$  [ $M$ ]<sup>+</sup>, 242.8 [ $M + H$ ]<sup>2+</sup>; anal. calcd. for C<sub>34</sub>H<sub>34</sub>BrN<sub>3</sub> × 0.5 H<sub>2</sub>O (573.6): C 71.20, H 6.15, N 7.33; found: C 71.18, H 6.21, N 7.08.

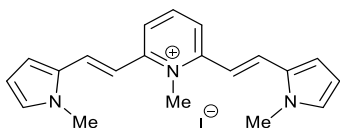

**1-Methyl-2,6-bis((E)-2-(1-methylpyrrol-2-yl)vinyl)pyridinium iodide (7x):** Prepared in 53% yield from **I7** and pyrrole-2-carboxaldehyde, followed by recrystallization from MeOH. Red needles, m.p. 252 °C (decomp.); <sup>1</sup>H NMR (300 MHz, DMSO): δ 8.28–8.11 (m, 3H), 7.68 (d, *J* = 15.5 Hz, 2H), 7.20 (d, *J* = 15.5 Hz, 2H), 7.12–7.00 (m, 4H), 6.21 (dd, *J* = 3.7, 2.7 Hz, 2H), 4.15 (s, 3H), 3.80 (s, 6H); <sup>13</sup>C NMR (75 MHz, DMSO): δ 153.3 (C<sub>q</sub>), 141.2 (CH), 130.4 (CH), 130.3 (C<sub>q</sub>), 128.3 (CH), 121.2 (CH), 112.8 (CH), 112.5 (CH), 109.6 (CH), 40.9 (CH<sub>3</sub>), 34.0 (CH<sub>3</sub>); MS (ESI<sup>+</sup>): *m/z* = 304.3 [*M*]<sup>+</sup>; anal. calcd. for C<sub>20</sub>H<sub>22</sub>N<sub>3</sub> × 0.3 H<sub>2</sub>O (436.7): C 55.00, H 5.22, N 9.62; found: C 55.00, H 5.17, N 9.82.

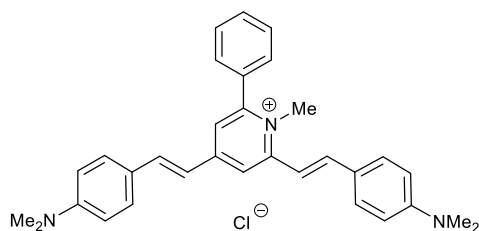

**2,4-Bis((E)-4-(dimethylamino)styryl)-1-methyl-6-phenylpyridinium chloride (8a):** Prepared in 31% yield from **I8** and 4-(dimethylamino)benzaldehyde, followed by ion exchange to prepare the chloride salt and recrystallization from EtOH. Dark-green solid, m.p. 192–193 °C; <sup>1</sup>H NMR (300 MHz, DMSO): δ 8.40 (d, *J* = 1.1 Hz, 1H), 8.02 (d, *J* = 16.2 Hz, 1H), 7.91 (d, *J* = 15.7 Hz, 1H), 7.76 (d, *J* = 1.2 Hz, 1H), 7.73 (d, *J* = 8.8 Hz, 2H), 7.67 (s, 5H), 7.57 (d, *J* = 8.8 Hz, 2H), 7.27 (d, *J* = 15.7 Hz, 1H), 7.16 (d, *J* = 16.1 Hz, 1H), 6.86–6.71 (m, 4H), 3.87 (s, 3H), 3.03 (s, 6H), 3.01 (s, 6H); <sup>13</sup>C NMR (75 MHz, DMSO): δ 153.8 (C<sub>q</sub>), 153.6 (C<sub>q</sub>), 151.9 (C<sub>q</sub>), 151.7 (C<sub>q</sub>), 151.3 (C<sub>q</sub>), 143.1 (CH), 141.0 (CH), 133.8 (C<sub>q</sub>), 130.5 (CH), 130.4 (CH), 129.8 (CH), 129.1 (CH), 129.0 (CH), 122.8 (C<sub>q</sub>), 122.6 (C<sub>q</sub>), 120.7 (CH), 118.5 (CH), 117.5 (CH), 112.6 (CH), 112.0 (CH), 111.8 (CH), 42.0 (CH<sub>3</sub>), 39.7 (CH<sub>3</sub>); MS (ESI<sup>+</sup>): *m/z* = 460.5 [*M*]<sup>+</sup>; anal. calcd. for C<sub>32</sub>H<sub>34</sub>ClN<sub>3</sub> × H<sub>2</sub>O (514.1): C 74.76, H 7.06, N 8.17; found: C 74.46, H 6.91, N 8.10.

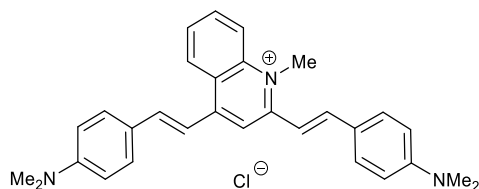

**2,4-Bis((E)-4-(dimethylamino)styryl)-1-methylquinolinium chloride (9a):** Prepared in 43% yield from **I9** and 4-(dimethylamino)benzaldehyde, followed by ion exchange to prepare the chloride salt and recrystallization from AcOEt–MeOH. Shiny dark-green solid, m.p. 223–234 °C; <sup>1</sup>H NMR (300 MHz, DMSO): δ 8.80 (d, *J* = 8.1 Hz, 1H), 8.54 (s, 1H), 8.33 (d, *J* = 8.9 Hz, 1H), 8.24 (d, *J* = 15.8 Hz, 1H), 8.18 (d, *J* = 16.2 Hz, 1H), 8.05 (t, *J* = 7.7 Hz, 1H), 7.92–7.76 (m, 6H), 7.48 (d, *J* = 15.6 Hz, 1H), 6.80 (d, *J* = 8.9 Hz, 4H), 4.33 (s, 3H), 3.05 (s, 6H), 3.04 (s,

6H);  $^{13}\text{C}$  NMR (75 MHz, DMSO):  $\delta$  154.1 (C<sub>q</sub>), 152.2 (C<sub>q</sub>), 151.7 (C<sub>q</sub>), 149.0 (C<sub>q</sub>), 146.4 (CH), 142.4 (CH), 139.6 (C<sub>q</sub>), 133.7 (CH), 131.2 (CH), 130.6 (CH), 127.2 (CH), 125.9 (CH), 124.5 (C<sub>q</sub>), 123.5 (C<sub>q</sub>), 122.7 (C<sub>q</sub>), 118.9 (CH), 113.7 (CH), 112.9 (CH), 112.8 (CH), 111.8 (CH), 111.7 (CH), 39.7 (CH<sub>3</sub>), 39.6 (CH<sub>3</sub>), 38.6 (CH<sub>3</sub>); MS (ESI<sup>+</sup>):  $m/z$  = 434.5 [ $M$ ]<sup>+</sup>; anal. calcd. for C<sub>30</sub>H<sub>32</sub>ClN<sub>3</sub> × 0.5 H<sub>2</sub>O (479.1): C 75.22, H 6.94, N 8.77; found: C 75.00, H 6.89, N 8.75.

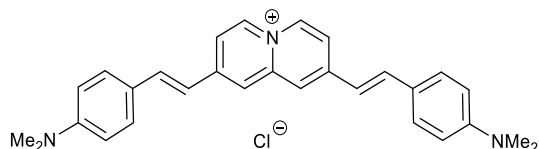

**2,8-Bis((E)-4-(dimethylamino)styryl)quinolizinium chloride (10a):** Prepared in 38% yield through the reaction of **I10** with 4-(dimethylamino)benzaldehyde in MeCN, followed by ion exchange to prepare the chloride salt and recrystallization from AcOEt–MeOH. Dark green solid, m.p. > 310 °C;  $^1\text{H}$  NMR (300 MHz, DMSO):  $\delta$  8.94 (d,  $J$  = 7.1 Hz, 2H), 8.18–7.97 (m, 4H), 7.73 (d,  $J$  = 16.1 Hz, 2H), 7.55 (d,  $J$  = 8.7 Hz, 4H), 7.16 (d,  $J$  = 16.1 Hz, 2H), 6.75 (d,  $J$  = 8.8 Hz, 4H), 3.00 (s, 12H);  $^{13}\text{C}$  NMR (75 MHz, DMSO):  $\delta$  151.4 (C<sub>q</sub>), 145.6(C<sub>q</sub>), 142.9(C<sub>q</sub>), 138.8 (CH), 135.5 (CH), 129.5 (CH), 122.9 (C<sub>q</sub>), 120.7 (CH), 118.2 (CH), 117.9 (CH), 112.0 (CH), 39.7 (CH<sub>3</sub>); MS (ESI<sup>+</sup>):  $m/z$  = 420.4 [ $M$ ]<sup>+</sup>; anal. calcd. for C<sub>29</sub>H<sub>30</sub>ClN<sub>3</sub> × H<sub>2</sub>O (474.4): C 73.48, H 6.80, N 8.86; found: C 73.38, H 7.13, N 8.63.

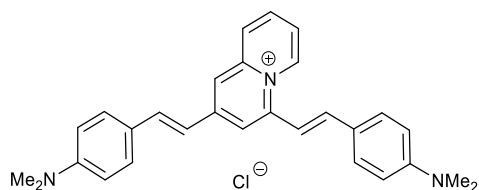

**2,4-Bis((E)-4-(dimethylamino)styryl)quinolizinium chloride (11a):** Prepared in 18% yield through the reaction of **I11** with 4-(dimethylamino)benzaldehyde in MeCN, followed by ion exchange to prepare the chloride salt and recrystallization from EtOH. Black solid, m.p. 208–209 °C;  $^1\text{H}$  NMR (300 MHz, DMSO):  $\delta$  9.40 (d,  $J$  = 7.0 Hz, 1H), 8.49 (s, 1H), 8.31 (s, 2H), 8.24–8.07 (t, 1H), 7.94 (d,  $J$  = 16.1 Hz, 1H), 7.85–7.50 (m, 7H), 7.21 (d,  $J$  = 16.2 Hz, 1H), 6.93–6.66 (m, 4H), 3.02 (s, 6H), 3.01 (s, 6H);  $^{13}\text{C}$  NMR (75 MHz, DMSO):  $\delta$  151.4 (2 C<sub>q</sub>), 145.5 (C<sub>q</sub>), 145.1 (C<sub>q</sub>), 143.2 (C<sub>q</sub>), 141.4 (CH), 139.2 (CH), 135.0 (CH), 132.4 (CH), 129.9 (CH), 129.4 (CH), 127.4 (CH), 123.0 (C<sub>q</sub>), 121.4 (CH), 119.3 (CH), 118.2 (CH), 118.1 (CH), 112.0 (CH), 111.8 (CH), 39.8 (CH<sub>3</sub>); MS (ESI<sup>+</sup>):  $m/z$  = 420.4 [ $M$ ]<sup>+</sup>; anal. calcd. for C<sub>29</sub>H<sub>30</sub>ClN<sub>3</sub> × 1.3 H<sub>2</sub>O (479.4): C 72.65, H 6.85, N 8.76; found: C 72.69, H 6.86, N 8.81.



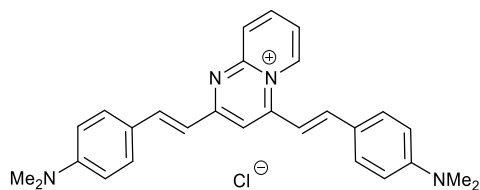

**2,4-Bis((E)-4-(dimethylamino)styryl)-1-azaquinolizinium chloride (12a):** Prepared in 14% yield through the reaction of **I12** with 4-(dimethylamino)benzaldehyde in acetic anhydride, followed by ion exchange to prepare the chloride salt and recrystallization from AcOEt–MeOH. Black solid, m.p. 261–262 °C; <sup>1</sup>H NMR (300 MHz, DMSO): δ 9.47 (d, *J* = 6.9 Hz, 1H), 8.47 (s, 1H), 8.39–8.29 (m, 1H), 8.26 (d, *J* = 15.8 Hz, 1H), 8.18–8.00 (m, 2H), 7.90–7.56 (m, 6H), 7.19 (d, *J* = 15.8 Hz, 1H), 6.90–6.71 (m, 4H), 3.05 (s, 6H), 3.04 (s, 6H); <sup>13</sup>C NMR (75 MHz, DMSO): δ 162.1 (C<sub>q</sub>), 152.2 (C<sub>q</sub>), 152.1 (C<sub>q</sub>), 150.5 (C<sub>q</sub>), 149.4 (C<sub>q</sub>), 144.9 (CH), 144.1 (CH), 139.9 (CH), 132.3 (CH), 131.0 (CH), 130.7 (CH), 127.1 (CH), 122.7 (C<sub>q</sub>), 122.4 (C<sub>q</sub>), 120.3 (CH), 118.7 (CH), 112.0 (CH), 111.8 (CH), 111.3 (CH), 109.1 (CH), 39.7 (CH<sub>3</sub>); MS (ESI<sup>+</sup>): *m/z* = 421.5 [*M*]<sup>+</sup>; anal. calcd. for C<sub>28</sub>H<sub>29</sub>ClN<sub>4</sub> × 0.5 H<sub>2</sub>O (466.0): C 72.17, H 6.49, N 12.02; found: C 71.76, H 6.57, N 11.83.

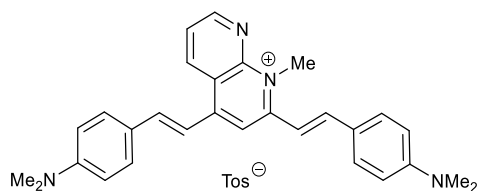

**2,4-Bis((E)-4-(dimethylamino)styryl)-1-methyl-1,8-naphthyridinium tosylate (13a):** Prepared in 39% yield from the reaction of **I13** and 4-(dimethylamino)benzaldehyde in acetic anhydride, followed by recrystallization from EtOH. Shiny black crystals, m.p. 166–168 °C; <sup>1</sup>H NMR (300 MHz, DMSO): δ 9.24 (d, *J* = 8.0 Hz, 1H), 9.08 (d, *J* = 3.5 Hz, 1H), 8.56 (s, 1H), 8.31 (d, *J* = 15.4 Hz, 1H), 8.15 (d, *J* = 15.6 Hz, 1H), 7.88–7.72 (m, 6H), 7.55–7.38 (m, 3H), 7.10 (d, *J* = 7.9 Hz, 2H), 6.78 (d, *J* = 8.4 Hz, 4H), 4.41 (s, 3H), 3.07 (s, 6H), 3.05 (s, 6H), 2.27 (s, 3H); <sup>13</sup>C NMR (75 MHz, DMSO): δ 155.4 (C<sub>q</sub>), 153.8 (CH), 152.6 (C<sub>q</sub>), 151.9 (C<sub>q</sub>), 148.9 (C<sub>q</sub>), 147.7 (C<sub>q</sub>), 147.6 (CH), 145.9 (C<sub>q</sub>), 142.7 (CH), 137.5 (C<sub>q</sub>), 135.6 (CH), 131.7 (CH), 130.8 (CH), 128.0 (CH), 125.5 (CH), 123.2 (C<sub>q</sub>), 122.9 (CH), 122.6 (C<sub>q</sub>), 119.7 (C<sub>q</sub>), 113.1 (CH), 112.3 (CH), 112.2 (CH), 111.8 (2 CH), 111.7 (CH), 39.7 (CH<sub>3</sub>), 34.9 (2 CH<sub>3</sub>), 20.8 (CH<sub>3</sub>); MS (ESI<sup>+</sup>): *m/z* = 435.5 [*M*]<sup>+</sup>; anal. calcd. for C<sub>36</sub>H<sub>38</sub>N<sub>4</sub>O<sub>3</sub>S × 0.5 H<sub>2</sub>O (615.8): C 70.22, H 6.38, N 9.10; found: C 70.18, H 6.40, N 9.10.

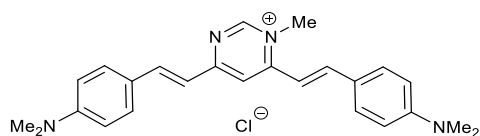

**4,6-Bis((E)-4-(dimethylamino)styryl)-1-methylpyrimidinium chloride, hydrochloride (14a):** Prepared in 33% yield through the reaction of **I14** with 4-(dimethylamino)benzaldehyde,

followed by ion exchange to prepare the chloride salt and recrystallization from MeCN–MeOH. Dark navy blue solid, m.p. 258–259 °C;  $^1\text{H}$  NMR (300 MHz, DMSO):  $\delta$  9.08 (s, 1H), 8.30 (s, 1H), 8.21 (d,  $J$  = 15.5 Hz, 1H), 8.11 (d,  $J$  = 15.6 Hz, 1H), 7.79 (d,  $J$  = 8.8 Hz, 2H), 7.65 (d,  $J$  = 8.8 Hz, 2H), 7.10 (d,  $J$  = 15.6 Hz, 2H), 6.84 (d,  $J$  = 8.1 Hz, 4H), 4.04 (s, 3H), 3.08 (s, 6H), 3.04 (s, 6H);  $^{13}\text{C}$  NMR (75 MHz, DMSO)  $\delta$  163.6 (C<sub>q</sub>), 156.5 (C<sub>q</sub>), 153.2 (CH), 152.8 (C<sub>q</sub>), 152.0 (C<sub>q</sub>), 147.2 (CH), 143.2 (CH), 131.9 (CH), 130.7 (CH), 122.7 (C<sub>q</sub>), 122.3 (C<sub>q</sub>), 118.1 (CH), 112.4 (CH), 112.1 (CH), 112.0 (CH), 108.7 (CH), 40.6 (CH<sub>3</sub>), 39.9 (CH<sub>3</sub>); MS (ESI<sup>+</sup>):  $m/z$  = 385.5 [ $M$ ]<sup>+</sup>; anal. calcd. for C<sub>25</sub>H<sub>29</sub>ClN<sub>4</sub> × 2.4 H<sub>2</sub>O (464.2): C 64.68, H 7.34, N 12.07; found: C 64.32, H 6.87, N 12.29.

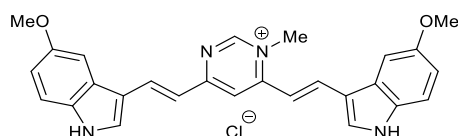

**4,6-Bis((E)-2-(5-methoxy-1H-indol-3-yl)vinyl)-1-methylpyrimidinium chloride (14p):**

Prepared in 48% yield through the reaction of **114** with 5-methoxyindole-3-carbaldehyde, followed by ion exchange to prepare the chloride salt and recrystallization from MeCN–MeOH. Dark-green microcrystalline solid, m.p. 295–296 °C;  $^1\text{H}$  NMR (300 MHz, DMSO):  $\delta$  12.33 (s, 1H), 12.04 (s, 1H), 9.05 (s, 1H), 8.58 (d,  $J$  = 15.5 Hz, 1H), 8.51–8.39 (m, 2H), 8.30 (d,  $J$  = 2.6 Hz, 1H), 8.08 (d,  $J$  = 2.6 Hz, 1H), 7.61 (dd,  $J$  = 7.7, 1.4 Hz, 2H), 7.53–7.35 (m, 2H), 7.22 (d,  $J$  = 15.6 Hz, 1H), 7.06 (d,  $J$  = 15.6 Hz, 1H), 6.94 (d,  $J$  = 7.5 Hz, 2H), 4.07 (s, 3H), 3.90 (s, 3H), 3.89 (s, 3H);  $^{13}\text{C}$  NMR (75 MHz, DMSO):  $\delta$  163.9 (C<sub>q</sub>), 156.5 (C<sub>q</sub>), 155.5 (C<sub>q</sub>), 155.3 (C<sub>q</sub>), 152.9 (CH), 140.7 (CH), 137.7 (CH), 134.4 (CH), 134.0 (CH), 132.7 (C<sub>q</sub>), 132.3 (C<sub>q</sub>), 126.2 (C<sub>q</sub>), 125.6 (C<sub>q</sub>), 116.8 (CH), 114.0 (C<sub>q</sub>), 113.6 (CH), 113.5 (C<sub>q</sub>), 113.4 (CH), 112.6 (CH), 112.1 (CH), 111.2 (CH), 107.7 (CH), 103.5 (CH), 102.8 (CH), 55.9 (CH<sub>3</sub>), 55.6 (CH<sub>3</sub>), 40.2 (CH<sub>3</sub>); MS (ESI<sup>+</sup>):  $m/z$  = 437.4 [ $M$ ]<sup>+</sup>; anal. calcd. for C<sub>27</sub>H<sub>25</sub>ClN<sub>4</sub>O<sub>2</sub> × 0.5 H<sub>2</sub>O (482.0): C 67.28, H 5.44, N 11.62; found: C 67.50, H 5.29, N 11.72.

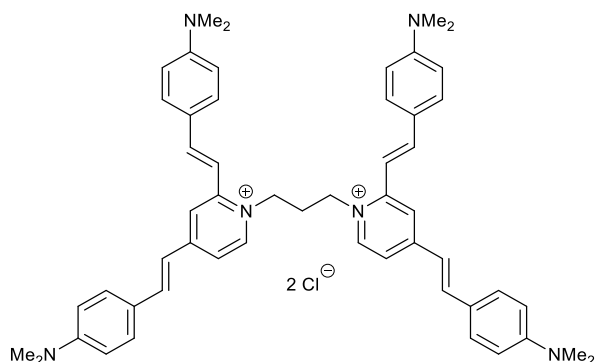

**1,1'-(1,3-Propanediyl)-bis(2,4-bis((E)-4-(dimethylamino)styryl)pyridinium) dichloride (15a):**

Prepared in 35% yield through the reaction of **115** with 4-(dimethylamino)benzaldehyde (6 molar equiv.), followed by ion exchange to prepare the chloride salt and recrystallization from EtOAc–MeOH. Dark-green solid, m.p. 295–296 °C;  $^1\text{H}$  NMR (300 MHz, DMSO):  $\delta$  8.73

(d,  $J = 6.9$  Hz, 2H), 8.37 (s, 2H), 7.93 (d,  $J = 16.1$  Hz, 2H), 7.86 (d,  $J = 15.6$  Hz, 2H), 7.80 (d,  $J = 6.7$  Hz, 2H), 7.72 (d,  $J = 8.8$  Hz, 4H), 7.56 (d,  $J = 8.8$  Hz, 4H), 7.22 (d,  $J = 15.6$  Hz, 2H), 7.12 (d,  $J = 16.1$  Hz, 2H), 6.76 (d,  $J = 8.9$  Hz, 4H), 6.68 (d,  $J = 8.9$  Hz, 4H), 4.89 (t,  $J = 6.5$  Hz, 4H), 3.00 (s, 12H), 2.97 (s, 12H), 2.44–2.34 (m, 2H);  $^{13}\text{C}$  NMR (75 MHz, DMSO):  $\delta$  152.1 (C<sub>q</sub>), 151.8 (C<sub>q</sub>), 151.7 (2 C<sub>q</sub>), 143.7 (CH), 143.5 (CH), 140.9 (CH), 130.7 (CH), 129.8 (CH), 122.7 (C<sub>q</sub>), 122.5 (C<sub>q</sub>), 119.4 (CH), 118.6 (CH), 117.7 (CH), 112.0, (CH) 111.7 (CH), 110.4 (CH), 52.7 (CH<sub>2</sub>), 39.7 (CH<sub>3</sub>), 39.6 (CH<sub>3</sub>), 30.0 (CH<sub>2</sub>); MS (ESI<sup>+</sup>):  $m/z = 894.0$  [ $M + \text{CF}_3\text{COO}^-$ ]<sup>+</sup>, 390.5 [ $M$ ]<sup>2+</sup>; anal. calcd. for C<sub>53</sub>H<sub>60</sub>Cl<sub>2</sub>N<sub>6</sub> × 1.5 H<sub>2</sub>O (879.0): C 72.42, H 7.22, N 9.56; found: C 72.43, H 7.26, N 9.51.

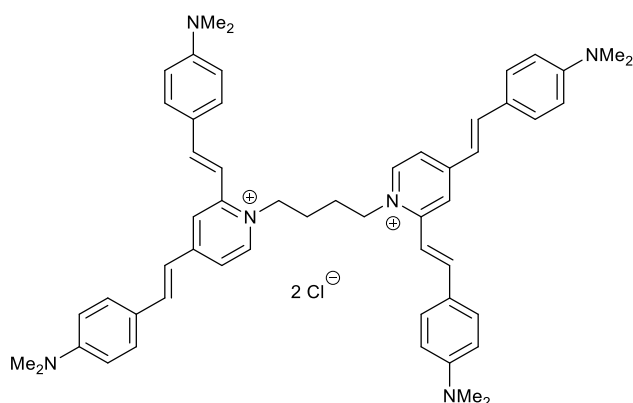

**1,1'-(1,4-Butanediyl)-bis(2,4-bis((E)-4-(dimethylamino)styryl)pyridinium) dichloride (16a):** Prepared in 28% yield through the reaction of **I16** with 4-(dimethylamino)benzaldehyde (6 molar equiv.), followed by ion exchange to prepare the chloride salt and recrystallization from EtOAc–MeOH. Brick-red solid, m.p. > 280 °C;  $^1\text{H}$  NMR (300 MHz, DMSO):  $\delta$  8.55 (d,  $J = 6.8$  Hz, 2H), 8.29 (s, 2H), 7.83 (d,  $J = 16.2$  Hz, 2H), 7.82 (d,  $J = 15.4$  Hz, 2H), 7.70 (d,  $J = 7.3$  Hz, 2H), 7.66 (d,  $J = 8.8$  Hz, 4H), 7.55 (d,  $J = 8.8$  Hz, 4H), 7.15 (d,  $J = 15.6$  Hz, 2H), 7.03 (d,  $J = 16.0$  Hz, 2H), 6.80 (d,  $J = 8.8$  Hz, 4H), 6.71 (d,  $J = 8.8$  Hz, 4H), 4.67 (br s, 4H), 3.03 (s, 12H), 2.97 (s, 12H), 1.87 (br s, 4H);  $^{13}\text{C}$  NMR (75 MHz, DMSO):  $\delta$  152.1 (C<sub>q</sub>), 151.8 (C<sub>q</sub>), 151.7 (C<sub>q</sub>), 151.5 (C<sub>q</sub>), 143.8 (CH), 143.0 (CH), 140.7 (CH), 130.4 (CH), 129.8 (CH), 122.7 (C<sub>q</sub>), 122.4 (C<sub>q</sub>), 119.4 (CH), 118.3 (CH), 117.5 (CH), 112.0 (CH), 111.7 (CH), 110.8 (CH), 55.0 (CH<sub>2</sub>), 39.7 (CH<sub>3</sub>), 39.6 (CH<sub>3</sub>), 25.6 (CH<sub>2</sub>); MS (ESI<sup>+</sup>):  $m/z = 908.0$  [ $M + \text{CF}_3\text{COO}^-$ ]<sup>+</sup>, 397.6 [ $M$ ]<sup>2+</sup>; anal. calcd. for C<sub>54</sub>H<sub>62</sub>Cl<sub>2</sub>N<sub>6</sub> × 2 H<sub>2</sub>O (902.1): C 71.90, H 7.38, N 9.32; found: C 72.30, H 7.39, N 9.20.

**General procedure for the synthesis of mono-styryl dyes by Knoevenagel condensation<sup>2</sup>:** A mixture of the heterocyclic salt **I17–I18** (1 mmol), aldehyde (1.5 mmol), and

<sup>2</sup> Except for the dye **19a** whose preparation is detailed below.

piperidine (0.10 mL, 1 mmol) in MeOH (5 mL) was heated under reflux for 2 h. After cooling to room temperature, the precipitated solid was collected by filtration, washed with MeOH (2 × 5 mL), Et<sub>2</sub>O (2 × 5 mL), dried and recrystallized from a suitable solvent (as indicated below), to give the analytically pure dye as an iodide salt.

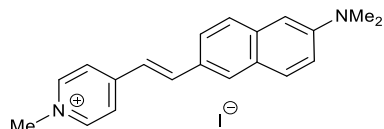

**4-((E)-2-(6-(dimethylamino)naphthalen-2-yl)vinyl)-1-methylpyridinium iodide (17n):**

Prepared in 24% yield through the reaction of **I17** with 6-dimethylamino-2-naphthaldehyde, followed by recrystallization from MeOH. Violet needles, m.p. 275–276 °C; <sup>1</sup>H NMR (300 MHz, DMSO): δ 8.79 (d, *J* = 6.4 Hz, 2H), 8.18 (d, *J* = 6.5 Hz, 2H), 8.09 (d, *J* = 16.2 Hz, 1H), 8.00 (s, 1H), 7.88–7.66 (m, 3H), 7.47 (d, *J* = 16.2 Hz, 1H), 7.26 (dd, *J* = 9.1, 2.1 Hz, 1H), 6.97 (d, *J* = 1.0 Hz, 1H), 4.23 (s, 3H), 3.06 (s, 6H); <sup>13</sup>C NMR (75 MHz, DMSO): δ 152.9 (C<sub>q</sub>), 149.6 (C<sub>q</sub>), 144.8 (CH), 141.5 (CH), 135.9 (C<sub>q</sub>), 130.2 (CH), 129.7 (CH), 128.4 (C<sub>q</sub>), 126.8 (CH), 125.5 (C<sub>q</sub>), 123.9 (CH), 122.9 (CH), 120.7 (CH), 116.5 (CH), 105.4 (CH), 46.7 (CH<sub>3</sub>), 40.1 (CH<sub>3</sub>); MS (ESI<sup>+</sup>): *m/z* = 289.4 [*M*]<sup>+</sup>; anal. calcd. for C<sub>20</sub>H<sub>21</sub>N<sub>2</sub> (416.3): C 57.70, H 5.08, N 6.73; found: C 58.02, H 5.13, N 6.43.

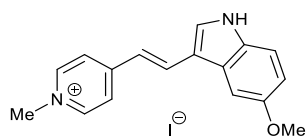

**4-((E)-2-(5-methoxy-1H-indol-3-yl)vinyl)-1-methylpyridinium iodide (17p):**

Prepared in 58% yield through the reaction of **I17** with 5-methoxyindole-3-carbaldehyde, followed by recrystallization from MeCN–EtOH. Strawberry-colored solid, m.p. 220–222 °C; <sup>1</sup>H NMR (300 MHz, DMSO): δ 11.81 (br s, 1H), 8.67 (d, *J* = 6.8 Hz, 2H), 8.25 (d, *J* = 16.2 Hz, 1H), 8.11 (d, *J* = 6.9 Hz, 2H), 7.96 (d, *J* = 2.7 Hz, 1H), 7.59 (d, *J* = 2.2 Hz, 1H), 7.40 (d, *J* = 8.8 Hz, 1H), 7.20 (d, *J* = 16.2 Hz, 1H), 6.90 (dd, *J* = 8.8, 2.3 Hz, 1H), 4.17 (s, 3H), 3.87 (s, 3H); <sup>13</sup>C NMR (75 MHz, DMSO): δ 155.0 (C<sub>q</sub>), 154.2 (C<sub>q</sub>), 144.0 (CH), 136.2 (CH), 132.3 (C<sub>q</sub>), 132.1 (CH), 125.8 (C<sub>q</sub>), 121.5 (CH), 116.2 (CH), 113.4 (C<sub>q</sub>), 113.2 (CH), 112.3 (CH), 102.9 (CH), 55.7 (CH<sub>3</sub>), 46.2 (CH<sub>3</sub>); MS (ESI<sup>+</sup>): *m/z* = 265.3 [*M*]<sup>+</sup>; anal. calcd. for C<sub>17</sub>H<sub>17</sub>IN<sub>2</sub>O × 0.3 H<sub>2</sub>O (397.6): C 51.35, H 4.46, N 7.04; found: C 51.30, H 4.58, N 7.06.

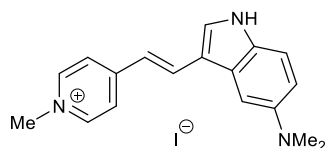

**4-((E)-2-(5-dimethylamino-1H-indol-3-yl)vinyl)-1-methylpyridinium iodide (17s):**

Prepared in 29% yield through the reaction of **I17** with 5-(dimethylamino)indole-3-carbaldehyde [11], followed by recrystallization from MeCN–EtOH. Black solid, m.p. 268–

269 °C; <sup>1</sup>H NMR (300 MHz, DMSO): δ 11.70 (s, 1H), 8.63 (d, *J* = 6.7 Hz, 2H), 8.24 (d, *J* = 16.1 Hz, 1H), 8.09 (d, *J* = 6.8 Hz, 2H), 7.88 (s, 1H), 7.34 (t, *J* = 8.9 Hz, 1H), 7.31 (d, *J* = 1.8 Hz, 1H), 7.11 (d, *J* = 16.2 Hz, 1H), 6.87 (dd, *J* = 8.9, 2.1 Hz, 1H), 4.16 (s, 3H), 2.96 (s, 6H); <sup>13</sup>C NMR (75 MHz, DMSO): δ 154.2 (C<sub>q</sub>), 147.0 (C<sub>q</sub>), 143.9 (CH), 136.7 (CH), 131.6 (CH), 130.8 (C<sub>q</sub>), 126.2 (C<sub>q</sub>), 121.3 (CH), 115.5 (CH), 113.1 (C<sub>q</sub>), 112.8 (CH), 111.9 (CH), 103.1 (CH), 46.1 (CH<sub>3</sub>), 41.8 (CH<sub>3</sub>); MS (ESI<sup>+</sup>): *m/z* = 278.3 [*M*]<sup>+</sup>, 132.2 [*M* – Me + H]<sup>2+</sup>; anal. calcd. for C<sub>18</sub>H<sub>20</sub>IN<sub>3</sub> (405.3): C 53.34, H 4.97, N 10.37; found: C 53.29, H 5.09, N 10.34.

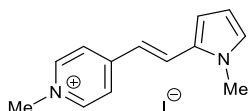

**4-((*E*)-2-(1-methylpyrrol-2-yl)vinyl)-1-methylpyridinium iodide (17x):** Prepared in 63% yield through the reaction of **I17** with 1-methylpyrrole-2-carboxaldehyde, followed by recrystallization from MeOH. Violet prisms, m.p. 252–254 °C; <sup>1</sup>H NMR (300 MHz, DMSO): δ 8.69 (d, *J* = 6.7 Hz, 2H), 8.10 (d, *J* = 6.7 Hz, 2H), 7.91 (d, *J* = 15.9 Hz, 1H), 7.08 (d, *J* = 2.2 Hz, 1H), 7.07 (d, *J* = 15.8 Hz, 1H), 6.88 (d, *J* = 2.6 Hz, 1H), 6.20 (dd, *J* = 3.8, 2.6 Hz, 1H), 4.17 (s, 3H), 3.80 (s, 3H); <sup>13</sup>C NMR (75 MHz, DMSO): δ 153.2 (C<sub>q</sub>), 144.2 (CH), 130.4 (C<sub>q</sub>), 129.4 (CH), 128.6 (CH), 122.1 (CH), 117.4 (CH), 112.3 (CH), 109.8 (CH), 46.3 (CH<sub>3</sub>), 34.1 (CH<sub>3</sub>); MS (ESI<sup>+</sup>): *m/z* = 199.3 [*M*]<sup>+</sup>; anal. calcd. for C<sub>13</sub>H<sub>15</sub>IN<sub>2</sub> (326.2): C 47.87, H 4.64, N 8.59; found: C 47.90, H 4.63, N 8.59.

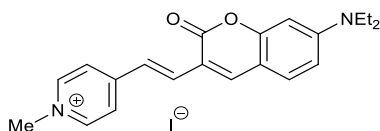

**4-((*E*)-2-(7-diethylamino-3-coumarinyl)vinyl)-1-methylpyridinium iodide (17y):** Prepared in a 52% yield through the reaction of **I17** with 7-diethylamino-3-formylcoumarin, followed by recrystallization from MeOH. Red solid, m.p. > 280 °C; <sup>1</sup>H NMR (300 MHz, DMSO): δ 8.78 (d, *J* = 6.4 Hz, 2H), 8.23 (s, 1H), 8.15 (d, *J* = 6.5 Hz, 2H), 7.82 (d, *J* = 16.1 Hz, 1H), 7.67 (d, *J* = 16.0 Hz, 1H), 7.55 (d, *J* = 8.9 Hz, 1H), 6.80 (d, *J* = 8.7 Hz, 1H), 6.60 (s, 1H), 4.22 (s, 3H), 3.49 (q, *J* = 6.4 Hz, 4H), 1.15 (t, *J* = 6.8 Hz, 6H); <sup>13</sup>C NMR (75 MHz, DMSO): δ 159.6 (C<sub>q</sub>), 156.3 (C<sub>q</sub>), 152.9 (C<sub>q</sub>), 151.9 (C<sub>q</sub>), 145.3 (CH), 144.8 (CH), 136.7 (CH), 130.7 (CH), 123.0 (CH), 122.6 (CH), 113.6 (C<sub>q</sub>), 110.0 (CH), 108.3 (C<sub>q</sub>), 96.2 (CH), 46.7 (CH<sub>3</sub>), 44.4 (CH<sub>2</sub>), 12.4 (CH<sub>3</sub>); MS (ESI<sup>+</sup>): *m/z* = 335.4 [*M*]<sup>+</sup>; anal. calcd. for C<sub>21</sub>H<sub>23</sub>IN<sub>2</sub>O<sub>2</sub> (462.3): C 54.56, H 5.01, N 6.06; found: C 54.53, H 5.01, N 6.05.

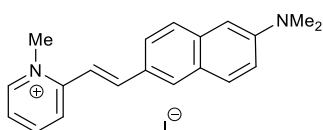

**2-((*E*)-2-(6-(dimethylamino)naphthalen-2-yl)vinyl)-1-methylpyridinium iodide (18n):** Prepared in 38% yield through the reaction of **I18** with 6-dimethylamino-2-naphthaldehyde,

followed by recrystallization from MeOH. Red crystals, m.p. 233–234 °C;  $^1\text{H}$  NMR (300 MHz, DMSO):  $\delta$  8.88 (d,  $J$  = 6.1 Hz, 1H), 8.54 (d,  $J$  = 7.5 Hz, 1H), 8.45 (t,  $J$  = 7.8 Hz, 1H), 8.11 (s, 1H), 8.06 (d,  $J$  = 15.9 Hz, 1H), 7.95 (dd,  $J$  = 8.7, 1.3 Hz, 1H), 7.89 – 7.79 (m, 2H), 7.76 (d,  $J$  = 8.7 Hz, 1H), 7.55 (d,  $J$  = 15.9 Hz, 1H), 7.29 (dd,  $J$  = 9.1, 2.3 Hz, 1H), 7.04 (s, 1H), 4.38 (s, 3H), 3.08 (s, 6H);  $^{13}\text{C}$  NMR (75 MHz, DMSO):  $\delta$  152.7 (C<sub>q</sub>), 149.3 (C<sub>q</sub>), 145.8 (CH), 143.8 (CH), 143.7 (CH), 136.0 (C<sub>q</sub>), 130.7 (CH), 129.8 (CH), 128.4 (C<sub>q</sub>), 126.7 (CH), 125.6 (C<sub>q</sub>), 124.4 (CH), 124.3 (CH), 124.2 (CH), 116.6 (CH), 114.7 (CH), 105.9 (CH), 45.9 (CH<sub>3</sub>), 40.2 (CH<sub>3</sub>); MS (ESI<sup>+</sup>):  $m/z$  = 289.4 [ $M$ ]<sup>+</sup>; anal. calcd. for C<sub>20</sub>H<sub>21</sub>N<sub>2</sub> × H<sub>2</sub>O (434.3): C 55.31, H 5.34, N 6.45; found: C 54.92, H 5.04, N 6.26.

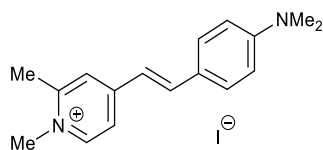

#### Synthesis of 4-((*E*)-4-(dimethylamino)styryl)-1,2-dimethylpyridinium iodide (**19a**)

**4-((*E*)-4-(dimethylamino)styryl)-2-methylpyridine:** A stirred solution of 4-(dimethylamino)-benzaldehyde (1.49 g, 10.0 mmol) and *t*-BuOK (1.23 g, 11.0 mmol) in anhydrous DMF (20 mL) was degassed by repeated vacuum–argon cycles and neat 2,4-lutidine (1.73 mL, 1.61 g, 15.0 mmol) was added via a syringe under argon atmosphere at room temperature. The mixture was stirred at room temperature for 24 h, and a second portion of *t*-BuOK (1.12 g, 10 mmol) was added under argon. After stirring for additional 24 h, the mixture was poured into water (200 mL) and the product was extracted with toluene (3 × 50 mL). The combined organic fractions were washed with water and brine and dried over Na<sub>2</sub>SO<sub>4</sub>. The solvent was removed under vacuum. Excess 2,4-lutidine was removed by co-evaporation with mesitylene (4 × 10 mL) in vacuo. The crude residue was purified by flash chromatography (SiO<sub>2</sub>, eluent: cyclohexane–MTBE, 60:40 to 30:70), to give 4-((*E*)-4-dimethylaminostyryl)-2-methylpyridine (0.82 g, 34%) as a dark-yellow solid, m.p. 156–158 °C;  $^1\text{H}$  NMR (300 MHz, CDCl<sub>3</sub>):  $\delta$  8.40 (d,  $J$  = 5.2 Hz, 1H), 7.43 (d,  $J$  = 8.8 Hz, 2H), 7.23 (d,  $J$  = 16.5 Hz, 1H), 7.19 (s, 1H), 7.15 (d,  $J$  = 5.3 Hz, 1H), 6.78 (d,  $J$  = 16.3 Hz, 1H), 6.71 (d,  $J$  = 8.9 Hz, 2H), 3.00 (s, 6H), 2.55 (s, 3H);  $^{13}\text{C}$  NMR (75 MHz, CDCl<sub>3</sub>)  $\delta$  158.6 (C<sub>q</sub>), 150.9 (C<sub>q</sub>), 149.4 (CH), 146.0 (C<sub>q</sub>), 133.1 (CH), 128.4 (CH), 124.6 (C<sub>q</sub>), 121.6 (CH), 120.1 (CH), 117.7 (CH), 112.3 (CH), 40.4 (CH<sub>3</sub>), 24.6 (CH<sub>3</sub>); MS (ESI<sup>+</sup>):  $m/z$  = 239.2 [ $M$  + H]<sup>+</sup>.

**4-((*E*)-4-(dimethylamino)styryl)-1,2-dimethylpyridinium iodide (**19a**):** A solution of 4-((*E*)-4-dimethylaminostyryl)-2-methylpyridine (0.650 g, 2.73 mmol) and iodomethane (0.26 mL, 0.58 g, 4.1 mmol) in anhydrous acetone (27 mL) was stirred at room temperature for 48 h. The precipitate was collected, washed with acetone and dried, to give **19a** (0.816 g, 79%) as a red solid, m.p. 149–150 °C;  $^1\text{H}$  NMR (300 MHz, DMSO):  $\delta$  8.68 (d,  $J$  = 6.7 Hz, 1H), 8.01 (d,

$J = 1.6$  Hz, 1H), 7.92–7.82 (m, 2H), 7.58 (d,  $J = 8.9$  Hz, 2H), 7.10 (d,  $J = 16.1$  Hz, 1H), 6.78 (d,  $J = 8.9$  Hz, 2H), 4.08 (s, 3H), 3.01 (s, 6H), 2.69 (s, 3H);  $^{13}\text{C}$  NMR (75 MHz, DMSO):  $\delta$  154.1 (C<sub>q</sub>), 153.3 (C<sub>q</sub>), 151.8 (C<sub>q</sub>), 145.0 (CH), 141.4 (CH), 130.0 (CH), 123.4 (CH), 122.5 (C<sub>q</sub>), 120.1 (CH), 117.0 (CH), 112.0 (CH), 44.0 (CH<sub>3</sub>), 39.7 (CH<sub>3</sub>), 19.81 (CH<sub>3</sub>); MS (ESI<sup>+</sup>):  $m/z = 253.4$  [ $M$ ]<sup>+</sup>; anal. calcd. for C<sub>17</sub>H<sub>21</sub>IN<sub>2</sub> × 0.33 H<sub>2</sub>O (386.2): C 52.87, H 5.65, N 7.25; found: C 52.93, H 5.63, N 7.28.

### **Photophysical studies**

**Buffer and dyes stock solutions.** Experiments with nucleic acids were performed in 'K-100' buffer, containing 0.1 M KCl and 0.01 M lithium cacodylate (LiAsO<sub>2</sub>Me<sub>2</sub>) in MilliQ water at pH 7.2 (adjusted with HCl). Absorption studies were performed either in the same buffer or in spectroscopic-grade solvents (methanol and DMSO). Dyes were dissolved in DMSO to obtain 4 mM stock solutions, except for the dyes **1d**, **1d** and **16a**, which were dissolved at a concentration of 1 mM, and **1m**, which was dissolved at a concentration of 0.5 mM, due to their lower solubility. Stock solutions of dyes were stored at –20 °C. Dye solutions were kept in the dark at all times, to avoid photoinduced degradation.

**DNA and RNA stock solutions.** Oligonucleotides were purchased from Eurogentec (RP- HPLC purification grade) and used without further purification. Stock solutions were prepared at 100  $\mu\text{M}$  (except for 46AG: 50  $\mu\text{M}$ ) in K-100 buffer and stored at 4 °C. Working solutions ( $c = 5.6$   $\mu\text{M}$ , except for 46AG:  $c = 2.8$   $\mu\text{M}$ ) were prepared by dilution of stock solutions in the same buffer. Heteroduplexes (*ds* 3+4, *ds* 5+8, and *ds* 6+7, Table S2) were prepared by mixing equal volumes of the corresponding single strands. The final concentration of heteroduplexes was 2.8  $\mu\text{M}$ , to account for the doubled number of nucleotides. The working solutions were subsequently annealed (5 min at 95 °C) and then allowed to cool down to room temperature overnight. Annealed solutions were stored at 4 °C. Calf thymus DNA (*ct DNA*, Invitrogen, 10 mg mL<sup>-1</sup>) and RNA from calf liver (*cl RNA*, Sigma-Aldrich, Type IV) were diluted with K- 100 buffer to  $c \approx 3$  mM in base pairs, as calculated by the absorption measurement at 260 nm (*ct DNA*:  $\epsilon_{\text{nucleotide}} = 6650 \text{ M}^{-1} \text{ cm}^{-1}$ , *cl RNA*:  $\epsilon_{\text{nucleotide}} = 8500 \text{ M}^{-1} \text{ cm}^{-1}$ ), and then further diluted so as to obtain working solutions with a nucleotide concentration comparable to the oligonucleotide samples (i.e., 110  $\mu\text{M}$ , considering 22 as the average length of oligonucleotides).

**Absorption studies.** Absorption spectra of the dyes in K-100 buffer, MeOH and (for some dyes) DMSO were recorded at 20 °C and dye concentration of 10  $\mu\text{M}$  in quartz cells with a path length of 1 cm, using a double-beam spectrophotometer (Hitachi U2900) operating at a

spectral bandpass of 1.5 nm. All samples were checked for the absence of visible precipitates at the moment of the measurements.

*Fixed-wavelength fluorescence measurements.* All fluorescence analyses were performed with a microplate reader (BMG FluoStar Omega), using a 96-well quartz plate with a transparent bottom (Hellma). Samples were prepared by mixing working solutions of DNA samples (5.6  $\mu\text{M}$  or equivalent in K-100 buffer, 90  $\mu\text{L}$ ) or the buffer alone with working solutions of dyes in K-100 buffer (25  $\mu\text{M}$  in K-100 buffer containing 2.5% v/v DMSO, 10  $\mu\text{L}$ ). The final concentrations were 2.5  $\mu\text{M}$  for the dye and 5  $\mu\text{M}$  (or equivalent) for DNA in a total volume of 100  $\mu\text{L}$  per well. The plates were stirred for 3 min at 300 rpm and then left to equilibrate for 1 h at room temperature in the dark. Fluorescence emission was recorded by using a microplate reader, exciting each dye at the appropriate wavelength with the aid of appropriate filters (Table S1). The instrument gain was set for each channel and kept constant throughout all the analyses.

*Multivariate analysis.* The light-up data matrix reported in Table S1 was normalized to a scale of 0 to 1; normalization was always performed for each nucleic acid sequence separately. Multivariate analysis (PCA) was performed with Origin Pro 2018b (OriginLab, Northampton, MA). The PCA data are presented as score plots of PC1 versus PC2.

*Fluorescence quantum yield and brightness measurements.* Dyes **1p**, **1u**, **17a** and **18a** were diluted in K-100 buffer at varying concentration (1.2–3  $\mu\text{M}$ ) alone or in the presence of G4 structures (*c-myc* or 22AG, 6  $\mu\text{M}$ ). Absorption and emission spectra ( $\lambda_{\text{ex}} = 500$  nm, slits width 5 nm, PMT voltage 550 V) of the resulting solutions were measured on a UV Cary-300 spectrophotometer and on a Cary Eclipse fluorimeter, respectively, using a transparent and asymmetric quartz cuvette (1  $\times$  0.4 cm pathlength). Fluorescence emission spectra were integrated between 510 and 800 nm and the obtained values were plotted as a function of the absorbance at 500 nm for each dye. The slope of the resulting plots was used for the quantum yield ( $\Phi$ ) calculations, using the data recorded for Rhodamine 6G at identical settings as a reference ( $\Phi = 0.95$  in EtOH [14]):

$$\Phi_{\text{sample}} = \Phi_{\text{ref}} \times \frac{S_{\text{sample}}}{S_{\text{ref}}} \times \frac{n_{\text{sample}}^2}{n_{\text{ref}}^2},$$

where  $\Phi$  is fluorescence quantum yield,  $S$  is the slope obtained from the *Area vs absorbance* plots and  $n$  is the refractive index of the solvents; subscripts *ref* and *sample* denote rhodamine 6G and dye or dye-G4 complex, respectively.

Molar absorptivity coefficients for the complexes at the absorption maximum were calculated from the absorbance and concentration data obtained for each dye-G4 complex. Brightness



(*B*) of each complex and of the dyes alone was subsequently calculated through the following formula:

$$B_{sample} = \varepsilon_{max\ sample} \times \Phi_{sample}$$

where  $\Phi$  is fluorescence quantum yield and  $\varepsilon_{max}$  is the molar absorptivity coefficient in the absorption maximum. As above, the subscript *sample* denotes the dye or dye-G4 complex.

**Table S1:** Excitation / emission wavelengths of optical filters (passband: 10 nm) and relative emission intensity enhancement ( $I/I_0$ ) of styryl dyes and Thioflavin T (ThT) ( $c = 2.5 \mu\text{M}$  in K-100 buffer) in the presence of 2 molar equiv. of G4-DNA (except for 46AG: 1 molar equiv.), G4-RNA, or ct DNA and cl RNA used at equivalent nucleotide concentration.

| Dye | ex / em filters (nm) | G4 DNA        |              |                |              |               |              |             |             |             |            | G4 RNA       |             | non-G4        |               |
|-----|----------------------|---------------|--------------|----------------|--------------|---------------|--------------|-------------|-------------|-------------|------------|--------------|-------------|---------------|---------------|
|     |                      | <i>c-kit2</i> | <i>25CEB</i> | <i>c-kit87</i> | <i>c-myc</i> | <i>c-src1</i> | <i>c-myb</i> | <i>22AG</i> | <i>46AG</i> | <i>HRAS</i> | <i>TBA</i> | <i>TERRA</i> | <i>NRAS</i> | <i>ct DNA</i> | <i>cl RNA</i> |
| 1a  | 544 / 620            | 30            | 22           | 34             | 40           | 10            | 6            | 82          | 99          | 36          | 4          | 170          | 15          | 3             | 4             |
| 1b  | 620 / 670            | 13            | 14           | 8              | 38           | 5             | 6            | 11          | 28          | 18          | 3          | 111          | 11          | 3             | 2             |
| 1c  | 485 / 544            | 27            | 26           | 27             | 26           | 12            | 4            | 34          | 97          | 63          | 7          | 59           | 12          | 7             | 6             |
| 1d  | 544 / 620            | 39            | 24           | 50             | 46           | 7             | 6            | 68          | 346         | 35          | 5          | 120          | 21          | 2             | 3             |
| 1d  | 620 / 670            | 3             | 3            | 4              | 4            | 2             | 3            | 2           | 2           | 2           | 2          | 46           | 2           | 2             | 2             |
| 1e  | 544 / 620            | 49            | 41           | 45             | 59           | 15            | 13           | 62          | 112         | 41          | 10         | 114          | 20          | 14            | 7             |
| 1f  | 590 / 670            | 85            | 72           | 109            | 112          | 32            | 14           | 104         | 113         | 118         | 22         | 147          | 60          | 11            | 7             |
| 1g  | 485 / 544            | 39            | 19           | 57             | 42           | 8             | 8            | 19          | 73          | 23          | 3          | 45           | 32          | 3             | 3             |
| 1h  | 485 / 544            | 46            | 17           | 47             | 28           | 18            | 12           | 20          | 59          | 22          | 5          | 144          | 33          | 4             | 7             |
| 1i  | 485 / 544            | 7             | 6            | 19             | 10           | 3             | 4            | 13          | 30          | 5           | 2          | 39           | 14          | 6             | 1             |
| 1j  | 544 / 620            | 1             | 1            | 1              | 1            | 1             | 1            | 1           | 1           | 1           | 1          | 1            | 1           | 1             | 1             |
| 1k  | 584 / 670            | 3             | 4            | 4              | 3            | 2             | 2            | 4           | 7           | 4           | 2          | 5            | 3           | 1             | 1             |
| 1l  | 544 / 620            | 2             | 2            | 2              | 1            | 1             | 1            | 2           | 2           | 2           | 1          | 3            | 2           | 1             | 2             |
| 1m  | 520 / 620            | 3             | 4            | 4              | 4            | 3             | 3            | 4           | 4           | 3           | 3          | 5            | 3           | 2             | 3             |
| 1o  | 544 / 584            | 85            | 49           | 81             | 76           | 51            | 18           | 52          | 115         | 119         | 21         | 353          | 69          | 7             | 16            |
| 1p  | 544 / 584            | 185           | 141          | 269            | 163          | 75            | 33           | 553         | 352         | 367         | 45         | 268          | 176         | 4             | 7             |
| 1q  | 544 / 590            | 93            | 29           | 67             | 67           | 13            | 10           | 39          | 52          | 28          | 3          | 355          | 61          | 1             | 11            |
| 1r  | 485 / 544            | 88            | 27           | 35             | 204          | 8             | 8            | 39          | 98          | 177         | 28         | 320          | 55          | 2             | 13            |
| 1s  | 485 / 544            | 31            | 54           | 23             | 238          | 8             | 11           | 17          | 50          | 46          | 5          | 16           | 26          | 48            | 9             |
| 1t  | 485 / 520            | 8             | 18           | 25             | 11           | 6             | 5            | 54          | 80          | 25          | 5          | 40           | 5           | 5             | 2             |
| 1u  | 544 / 584            | 193           | 27           | 34             | 252          | 11            | 8            | 45          | 41          | 205         | 99         | 383          | 128         | 1             | 33            |
| 1v  | 485 / 520            | 215           | 168          | 149            | 344          | 49            | 82           | 202         | 209         | 232         | 97         | 497          | 153         | 9             | 35            |
| 1w  | 485 / 544            | 6             | 3            | 9              | 4            | 2             | 2            | 3           | 6           | 2           | 2          | 7            | 6           | 3             | 2             |
| 1x  | 544 / 620            | 346           | 115          | 393            | 282          | 111           | 56           | 148         | 485         | 341         | 26         | 689          | 200         | 36            | 63            |
| 1y  | 544 / 620            | 13            | 26           | 13             | 38           | 6             | 5            | 23          | 35          | 27          | 2          | 50           | 15          | 2             | 1             |
| 1z  | 544 / 620            | 1             | 1            | 1              | 1            | 1             | 1            | 1           | 1           | 1           | 1          | 1            | 1           | 1             | 1             |
| 1p  | 544 / 620            | 1             | 1            | 1              | 1            | 1             | 1            | 1           | 1           | 1           | 1          | 5            | 1           | 1             | 1             |
| 2a  | 544 / 620            | 22            | 20           | 24             | 39           | 9             | 9            | 61          | 76          | 69          | 4          | 122          | 16          | 6             | 3             |
| 2i  | 485 / 544            | 17            | 13           | 21             | 19           | 9             | 7            | 20          | 49          | 11          | 7          | 19           | 21          | 12            | 6             |
| 2n  | 584 / 670            | 3             | 3            | 3              | 3            | 2             | 1            | 7           | 7           | 7           | 1          | 21           | 5           | 1             | 1             |
| 3a  | 544 / 620            | 16            | 13           | 16             | 27           | 7             | 5            | 38          | 41          | 27          | 3          | 103          | 11          | 4             | 3             |
| 4a  | 584 / 670            | 45            | 39           | 44             | 52           | 19            | 7            | 124         | 112         | 147         | 9          | 267          | 39          | 10            | 8             |
| 5a  | 590 / 670            | 102           | 110          | 118            | 148          | 57            | 20           | 326         | 215         | 190         | 39         | 311          | 102         | 25            | 11            |
| 6a  | 544 / 620            | 8             | 9            | 9              | 12           | 3             | 3            | 32          | 30          | 8           | 2          | 20           | 4           | 2             | 2             |
| 7a  | 544 / 620            | 19            | 12           | 22             | 20           | 9             | 9            | 14          | 28          | 19          | 3          | 168          | 9           | 12            | 4             |
| 7b  | 584 / 670            | 5             | 4            | 4              | 4            | 2             | 1            | 3           | 5           | 3           | 2          | 22           | 2           | 2             | 2             |
| 7e  | 544 / 620            | 62            | 76           | 74             | 105          | 20            | 11           | 51          | 118         | 68          | 10         | 69           | 45          | 35            | 3             |
| 7f  | 544 / 620            | 30            | 35           | 39             | 46           | 18            | 8            | 25          | 55          | 62          | 4          | 52           | 28          | 22            | 2             |
| 7i  | 485 / 544            | 3             | 4            | 3              | 5            | 4             | 1            | 3           | 5           | 4           | 2          | 34           | 2           | 2             | 2             |
| 7n  | 584 / 670            | 2             | 2            | 2              | 3            | 2             | 3            | 2           | 3           | 3           | 2          | 4            | 3           | 2             | 2             |
| 7x  | 544 / 590            | 216           | 86           | 186            | 204          | 33            | 28           | 90          | 181         | 100         | 6          | 195          | 113         | 3             | 9             |
| 7d  | 485 / 544            | 1             | 1            | 1              | 1            | 1             | 1            | 1           | 1           | 1           | 1          | 1            | 1           | 1             | 1             |
| 8a  | 584 / 670            | 29            | 25           | 35             | 28           | 7             | 6            | 50          | 66          | 51          | 4          | 97           | 12          | 7             | 3             |
| 9a  | 544 / 620            | 5             | 4            | 5              | 2            | 2             | 11           | 11          | 20          | 12          | 2          | 6            | 3           | 3             | 2             |
| 10a | 544 / 620            | 5             | 4            | 7              | 5            | 3             | 2            | 9           | 12          | 2           | 0          | 8            | 1           | 2             | 0             |
| 11a | 544 / 620            | 10            | 23           | 32             | 48           | 15            | 7            | 51          | 96          | 45          | 5          | 154          | 18          | 5             | 6             |
| 12a | 620 / 670            | 6             | 9            | 5              | 12           | 5             | 3            | 15          | 43          | 17          | 2          | 56           | 6           | 2             | 3             |
| 13a | 620 / 720            | 7             | 10           | 4              | 2            | 7             | 2            | 4           | 19          | 14          | 2          | 20           | 5           | 2             | 2             |
| 14a | 620 / 670            | 12            | 11           | 18             | 17           | 4             | 4            | 89          | 62          | 21          | 3          | 54           | 6           | 2             | 2             |
| 14p | 520 / 620            | 80            | 57           | 83             | 111          | 23            | 22           | 132         | 121         | 139         | 32         | 178          | 43          | 3             | 12            |
| 15a | 584 / 670            | 11            | 13           | 20             | 10           | 6             | 5            | 19          | 55          | 3           | 4          | 24           | 8           | 2             | 2             |
| 16a | 584 / 670            | 25            | 28           | 41             | 16           | 12            | 60           | 42          | 68          | 32          | 6          | 117          | 33          | 6             | 5             |
| 17a | 544 / 620            | 161           | 83           | 244            | 338          | 44            | 15           | 84          | 184         | 83          | 5          | 169          | 92          | 5             | 8             |
| 17n | 520 / 670            | 19            | 13           | 22             | 14           | 5             | 4            | 24          | 38          | 16          | 2          | 16           | 8           | 3             | 2             |
| 17p | 485 / 544            | 101           | 34           | 81             | 94           | 14            | 14           | 51          | 166         | 78          | 10         | 78           | 100         | 12            | 16            |
| 17s | 485 / 544            | 21            | 8            | 11             | 21           | 3             | 4            | 7           | 17          | 8           | 2          | 21           | 32          | 3             | 7             |
| 17x | 485 / 544            | 6             | 2            | 7              | 9            | 2             | 2            | 2           | 6           | 2           | 1          | 6            | 11          | 1             | 1             |
| 17y | 544 / 584            | 7             | 5            | 7              | 13           | 2             | 3            | 7           | 11          | 9           | 3          | 10           | 6           | 6             | 2             |
| 18a | 544 / 620            | 215           | 61           | 265            | 302          | 70            | 1            | 60          | 166         | 59          | 3          | 10           | 13          | 2             | 11            |
| 18n | 544 / 620            | 11            | 15           | 35             | 29           | 8             | 8            | 31          | 102         | 35          | 2          | 62           | 20          | 5             | 3             |
| 19a | 544 / 620            | 167           | 118          | 239            | 185          | 50            | 18           | 90          | 172         | 53          | 4          | 144          | 61          | 2             | 8             |
| ThT | 460 / 544            | 76            | 38           | 102            | 111          | 21            | 16           | 168         | 176         | 102         | 9          | 94           | 203         | 2             | 10            |

**Table S2:** DNA sequences used in the double-dye analysis.

| <b>Acronym</b>            | <b>Sequence (5' → 3')</b>                        | <b>Conformation</b>         | <b>PDB</b> | <b>c (μM)<sup>a</sup></b> |
|---------------------------|--------------------------------------------------|-----------------------------|------------|---------------------------|
| <i>22AG</i>               | AGGGTTAGGGTTAGGGTTAGGG                           | Hybrid G4                   | -          | 5                         |
| <i>UpsB-Q3</i>            | CAGGGTTAAGGGTATACATTTAGGGGT<br>TAGGGTT           | Hybrid G4                   | -          | 5                         |
| <i>26TTA</i>              | TTAGGGTTAGGGTTAGGGTTAGGGTT                       | Hybrid G4                   | 2JPZ       | 5                         |
| <i>25TAG</i>              | TAGGGTTAGGGTTAGGGTTAGGGTT                        | Hybrid G4                   | 2JSL       | 5                         |
| <i>23TAG</i>              | TAGGGTTAGGGTTAGGGTTAGGG                          | Hybrid G4                   | 2JSK       | 5                         |
| <i>24TTA</i>              | TTAGGGTTAGGGTTAGGGTTAGGG                         | Hybrid G4                   | 2JSL       | 5                         |
| <i>46AG</i>               | A(GGGTTA) <sub>7</sub> GGG                       | Hybrid G4                   | -          | 2.5                       |
| <i>Bcl2Mid</i>            | GGGCGCGGGAGGAATTGGGCGGG                          | Hybrid G4                   | 2F8U       | 5                         |
| <i>26CEB</i>              | AAGGGTGGGTGTAAGTGTGGGTGGGT                       | Parallel G4                 | 2LPW       | 5                         |
| <i>c-kit2-<br/>T12T21</i> | CGGGCGGGCGCTAGGGAGGGT                            | Parallel G4                 | 2KYP       | 5                         |
| <i>KRAS-22RT</i>          | AGGGCGGTGTGGGAATAGGGAA                           | Parallel G4                 | 5I2V       | 5                         |
| <i>c-myc</i>              | TGAGGGTGGGTAGGGTGGGTAA                           | Parallel G4                 | 1XAV       | 5                         |
| <i>VEGF</i>               | CGGGCGGGCCTTGGGCGGGGT                            | Parallel G4                 | 2M27       | 5                         |
| <i>T95-2T</i>             | TTGGGTGGGTGGGTGGGT                               | Parallel G4                 | 2LK7       | 5                         |
| <i>TBA</i>                | GGTTGGTGTGGTTGG                                  | Anti-parallel G4            | 148D       | 5                         |
| <i>HIV-PRO-1</i>          | TGGCCTGGGCGGGACTGGG                              | Anti-parallel G4            | -          | 5                         |
| <i>Bm-U16</i>             | TAGGTTAGGTTAGGTUAGG                              | Anti-parallel G4            | -          | 5                         |
| <i>Bom17</i>              | GGTTAGGTTAGGTTAGG                                | Anti-parallel G4            | -          | 5                         |
| <i>G4CT</i>               | GGGGCTGGGGCTGGGGCTGGGG                           | Anti-parallel G4            | -          | 5                         |
| <i>ct DNA</i>             | Calf thymus DNA, highly polymerized              | Duplex                      | -          | 110 <sup>b</sup>          |
| <i>ds26</i>               | CAATCGGATCGAATTCGATCCGATTG                       | Duplex (self-complementary) | -          | 5                         |
| <i>ds-lac</i>             | GAATTGTGAGCGCTCACAATTC                           | Duplex (self-complementary) | -          | 5                         |
| <i>ds 5 + 8</i>           | GGAGAGAGAGTGTGTGTGTGGG +<br>CCCACACACACTCTCTCTCC | Heteroduplex                | -          | 2.5 <sup>c</sup>          |

|                        |                                                         |               |   |                  |
|------------------------|---------------------------------------------------------|---------------|---|------------------|
| <i>ds 3 + 4</i>        | GTCGCCGGGCCAGTCGTCCATAC +<br>GTATGGACGACTGGCCCCGGCGAC   | Heteroduplex  | - | 2.5 <sup>c</sup> |
| <i>ds 6 + 7</i>        | GACGTGTCGAAAGAGCTCCGATTA +<br>TAATCGGAGCTCTTTTCGACACGTC | Heteroduplex  | - | 2.5 <sup>c</sup> |
| <i>ss1</i>             | CACTAAACCTAACACTAACCAT                                  | Single strand | - | 5                |
| <i>ss2</i>             | ATGCCCTACGCGTCTTCTACTT                                  | Single strand | - | 5                |
| <i>ss3</i>             | GTCGCCGGGCCAGTCGTCCATAC                                 | Single strand | - | 5                |
| <i>ss4</i>             | GTATGGACGACTGGCCCCGGCGAC                                | Single strand | - | 5                |
| <i>ss5</i>             | CCCACACACACACTCTCTCTCC                                  | Single strand | - | 5                |
| <i>ss6</i>             | GACGTGTCGAAAGAGCTCCGATTA                                | Single strand | - | 5                |
| <i>ss7</i>             | TAATCGGAGCTCTTTTCGACACGTC                               | Single strand | - | 5                |
| <i>dT<sub>26</sub></i> | TTTTTTTTTTTTTTTTTTTTTTTTTTTT                            | Single strand | - | 5                |

<sup>a</sup> Final concentration used in the double dye assay, expressed in oligonucleotide strands unless stated otherwise.

<sup>b</sup> Nucleotide concentration. <sup>c</sup> Concentration of duplexes.

## REFERENCES

1. Matsui, M.; Kawamura, S.; Shibata, K.; Muramatsu, H. *Bull. Chem. Soc. Jpn.* **1992**, *65*, 71–74.
2. Xie, X.; Choi, B.; Largy, E.; Guillot, R.; Granzhan, A.; Teulade-Fichou, M.-P. *Chem. Eur. J.* **2013**, *19*, 1214–1226.
3. Sato, K.; Okazaki, S.; Yamagishi, T.; Arai, S. *J. Heterocycl. Chem.* **2004**, *41*, 443–447.
4. Bridger, G. J.; Skerlj, R. T.; Padmanabhan, S.; Martellucci, S. A.; Henson, G. W.; Abrams, M. J.; Joao, H. C.; Witvrouw, M.; De Vreese, K.; Pauwels, R.; De Clercq, E. *J. Med. Chem.* **1996**, *39*, 109–119.
5. Campbell, K. N.; Schaffner, I. J. *J. Am. Chem. Soc.* **1945**, *67*, 86–89.
6. Nawrat, C. C.; Lewis, W.; Moody, C. J. *J. Org. Chem.* **2011**, *76*, 7872–7881.
7. Khmaruk, A. M.; Volovenko, Y. M.; Chuiguk, V. A. *Ukr. Khim. Zh.* **1972**, *38*, 262–264.
8. Nam, T.; Wijtmans, M.; Pratt, D. A.; Porter, N. A. *Synthesis* **2005**, 1397–1404.
9. Hamada, Y.; Takeuchi, I.; Sato, M. *Yakugaku Zasshi* **1974**, *94*, 1328–1334.
10. Xie, X.; Renvoisé, A.; Granzhan, A.; Teulade-Fichou, M.-P. *New J. Chem.* **2015**, *39*, 5931–5935.
11. DeGraw, J. I. *Can. J. Chem.* **1966**, *44*, 387–393.
12. Klymchenko, A. S.; Pivovarenko, V. G.; Ozturk, T.; Demchenko, A. P. *New J. Chem.* **2003**, *27*, 1336–1343.
13. Wang, H.; Helgeson, R.; Ma, B.; Wudl, F. *J. Org. Chem.* **2000**, *65*, 5862–5867.
14. Kubin, R. F.; Fletcher, A. N. *J. Lumin.* **1982**, *27*, 455–462.
